1 **Cell-specific alterations in *Pitx1* regulatory landscape activation caused**  
2 **by the loss of a single enhancer**

3  
4  
5 Raquel Rouco<sup>1,2\*</sup>, Olimpia Bompadre<sup>1,2\*</sup>, Antonella Rauseo<sup>1,2</sup>, Olivier Fazio<sup>3</sup>, Fabrizio Thorel<sup>3</sup>,  
6 Rodrigue Peraldi<sup>1,2</sup>, Guillaume Andrey<sup>1,2</sup>

7  
8  
9 <sup>1</sup>Department of Genetic Medicine and Development, Faculty of Medicine, University of  
10 Geneva, Geneva, Switzerland

11 <sup>2</sup>Institute of Genetics and Genomics in Geneva (iGE3), University of Geneva, Geneva,  
12 Switzerland

13 <sup>3</sup> Transgenesis Core Facility, Faculty of Medicine, University of Geneva, Geneva, Switzerland

14  
15 \*Authors contributed equally

16 Correspondence: [guillaume.andrey@unige.ch](mailto:guillaume.andrey@unige.ch)

17

18 **Abstract**

19  
20 Most developmental genes rely on multiple transcriptional enhancers for their accurate expression  
21 during embryogenesis. Because enhancers may have partially redundant activities, the loss of one  
22 of them often leads to a partial loss of gene expression and concurrent moderate phenotypic  
23 outcome, if any. While such a phenomenon has been observed in many instances, the nature of the  
24 underlying mechanisms remains elusive. We used the *Pitx1* testbed locus to characterize in detail  
25 the regulatory and cellular identity alterations following the deletion *in vivo* of one of its enhancers  
26 (*Pen*), which normally accounts for 30 percent of *Pitx1* expression in hindlimb buds. By combining  
27 single cell transcriptomics and a novel *in embryo* cell tracing approach, we observed that this global  
28 decrease in *Pitx1* expression results from both an increase in the number of non- or low-expressing  
29 cells, and a decrease in the number of high-expressing cells. We found that the over-representation  
30 of *Pitx1* non/low-expressing cells originates from a failure of the *Pitx1* locus to coordinate enhancer  
31 activities and 3D chromatin changes. The resulting increase in *Pitx1* non/low-expressing cells  
32 eventually affects the proximal limb more severely than the distal limb, leading to a clubfoot  
33 phenotype likely produced through a localized heterochrony and concurrent loss of irregular  
34 connective tissue. This data suggests that, in some cases, redundant enhancers may be used to  
35 locally enforce a robust activation of their host regulatory landscapes.

## 36 Introduction

37

38 Alteration in the enhancer composition of regulatory landscapes at developmental genes can lead  
39 to pathologies by modifying the dosage and/or distribution of genes transcription (Kvon et al. 2021).  
40 Indeed, over the past years, loss of single regulatory units within complex and partially redundant  
41 regulatory landscapes were shown to have clear phenotypical outcomes despite inducing only  
42 partial decreases in average transcription (Montavon et al. 2011; Will et al. 2017; Osterwalder et al.  
43 2018). As the alterations in the regulatory mechanisms following enhancer deletion have mostly  
44 been characterized using bulk tissue analysis, it has been difficult to determine the cell-specific  
45 variability behind the loss of expression that accounts for phenotypes. In order to understand the  
46 precise molecular origin of these phenotypes, it is therefore essential to characterize how a single  
47 enhancer contributes to the activation of entire regulatory landscapes in specific cell populations.  
48 An effective model system to address these unsolved questions is the limb bud, where  
49 organogenesis requires a tight control of gene transcription to achieve correct patterning (Petit et  
50 al. 2017) . Critical to this is *Pitx1*, a transcription factor coding gene that is normally expressed in  
51 developing hindlimb buds, but not in forelimbs, which channels the limb development program to  
52 differentiate into a leg (Lanctot et al. 1997; Infante et al. 2013; Nemeč et al. 2017). Consequently,  
53 forelimb *Pitx1* gain-of-function can induce an arm-to-leg transformation, featured by the  
54 appearance of an ectopic patella as well as complex changes in the muscular and tendon wiring  
55 (DeLaurier et al. 2006; Kragestein et al. 2018). In contrast, *Pitx1* knock out has been shown to induce  
56 partial leg-to-arm transformations with the disappearance of the patella as well as long bone  
57 dysplasia and polydactyly (Lanctot et al. 1999b; DeLaurier et al. 2006). Unexpectedly, bulk  
58 transcriptomics strategies have only revealed marginal downstream gene expression changes upon  
59 *Pitx1* loss, suggesting that an interplay between these changes and the growth rate of limb cell  
60 subpopulations collectively result in the various phenotypes (Lanctot et al. 1999b; DeLaurier et al.  
61 2006; Alvarado et al. 2011; Nemeč et al. 2017; Kragestein et al. 2018).

62 As for many developmental genes, several enhancers coordinate *Pitx1* expression in hindlimbs,  
63 among which is *Pen*, previously shown to account for 35-50% of *Pitx1* hindlimb expression  
64 (Kragestein et al. 2018; Thompson et al. 2018). The deletion of *Pen* has no impact on bone length  
65 or digit numbers but induces a partially penetrant clubfoot phenotype, similar to the one observed  
66 in mice and humans upon *Pitx1* haploinsufficiency (Alvarado et al. 2011; Kragestein et al. 2018).  
67 One particularity to the *Pitx1* locus is that it establishes fundamentally different 3D chromatin

68 conformation in transcriptionally active hindlimbs and inactive forelimbs. In active hindlimbs, *Pitx1*  
69 forms chromatin interactions with cognate *cis*-regulatory regions spread over 400 kbs, including *Pen*  
70 as well as *Pit*, *RA4* and *PeIB*. In contrast, in inactive forelimbs these interactions are absent and the  
71 *Pitx1* gene forms a contact with the polycomb-repressed gene *Neurog1* (Kragesteen et al. 2018).  
72 In this work, we use a combination of single cell transcriptomics (scRNA-seq), a fluorescent cell-  
73 tracing approach and genomic technologies to define the contribution of a single enhancer (*Pen*) in  
74 establishing the epigenetically- and structurally-active *Pitx1* regulatory landscape. Moreover, we  
75 investigate whether changes in enhancer activities or 3D structure fundamentally associate with  
76 transcription or if those can be functionally disconnected of the transcriptional process. Finally, we  
77 assessed if *Pitx1* expression is homogenous across limb cell population and if distinct expression  
78 levels rely on different enhancer repertoires or, alternatively, in progressive changes in *cis*-  
79 regulatory landscape activities.  
80

## 81 **Results**

### 82 **Two approaches to track *Pitx1* activities suggest a bimodal *cis*-regulatory behavior**

83 In order to characterize transcriptional, chromatin and structural changes following the *Pen*  
84 enhancer deletion, we combined genetic manipulation of the *Pitx1* locus with scRNA-seq and  
85 chromatin analysis of sorted limb cell populations. Both approaches enable characterization of  
86 complementary features of gene transcriptional regulation following alterations of the *cis*-  
87 regulatory landscape.

88 First, to define the hindlimb cell types that are expressing *Pitx1* and to assess how the *Pen* enhancer  
89 regulates its expression in these cells, we generated single-cell preparations from wildtype fore- and  
90 hindlimb buds as well as *Pen* enhancer deleted (*Pitx1<sup>Pen-/Pen-</sup>*) or *Pitx1* knocked-out (*Pitx1<sup>-/-</sup>*)  
91 hindlimbs (**Fig. 1A**). We performed 10x genomics in duplicates from E12.5 limb buds as these  
92 correspond to a transition stage between patterning and cell-differentiation phases. By performing  
93 unsupervised clustering of all the wildtype and mutant single cell transcriptomic datasets, we  
94 identified five clusters (**Fig 1B**) corresponding to the main populations of the limb: one mesenchymal  
95 cluster (*Prrx1+*; 90% of the cells) and four satellite clusters including muscle (*Myod1+*, *Ttn+*; 4% of  
96 the cells), epithelium (*Wnt6+*, *Krt17+*; 5% of the cells), endothelium (*Cdh5+*, *Cldn5+*; 1.5% of the  
97 cells) and one immune cell cluster (*C1qa*, *Ccr1+*; 0.05% of the cells) (**Supplementary Table S1**). Yet,  
98 as *Pitx1* is expressed only in the hindlimb mesenchymal cluster (**Fig 1C**), further analyses will be  
99 performed only in these cells.

100 In parallel, we devised a fluorescent reporter system to track the regulatory activities of the *Pitx1*  
101 locus in hindlimbs (**Fig 1D**). Specifically, we first established a reporter line (*Pitx1<sup>GFP</sup>*) by  
102 homozygously integrating a regulatory sensor cassette, constituted of a minimal  $\beta$ -*globin* promoter  
103 and an EGFP reporter gene, 2kb upstream of the *Pitx1* promoter in mouse embryonic stem cells  
104 (mESCs). These cells were then re-targeted to obtain a homozygous deletion of the *Pen* enhancer  
105 (*Pitx1<sup>GFP;APen</sup>*). Embryos were then derived from the mESCs *via* tetraploid complementation (Artus  
106 and Hadjantonakis 2011). Conventional and light sheet imaging of *Pitx1<sup>GFP</sup>* embryos showed that the  
107 reporter was expressed in all *Pitx1* expression domains including the pituitary gland, the mandible,  
108 the genital tubercle and the hindlimbs (**Fig. 1D, S1A, Supplementary Video S1**) (Lanctot et al. 1999a;  
109 Lanctot et al. 1999b; Chiu et al. 2010).

110 We then FACS sorted GFP+ and GFP- cells from E12.5 hindlimbs and processed cells for RNA-seq,  
111 ChIP-seq and Capture-HiC (C-HiC) (**Fig. 1F-G, S1B-C**). We found that 8% of the cells in wildtype

112 hindlimbs displayed no EGFP signal, thereby suggesting that a majority of hindlimb cells possess an  
113 active *Pitx1* regulatory landscape. Following cell sorting, we next compared the transcriptome of  
114 GFP+ and GFP- cells and observed a 35-fold enrichment for *Pitx1* expression in GFP+ cells, validating  
115 the *Pitx1<sup>GFP</sup>* allele to track the *Pitx1* regulatory landscape activities (**Fig. 1F, S2A, Supplementary**  
116 **Table S2**). As expected from our scRNA-seq analyses, we found that GFP+/Pitx1+ cells were enriched  
117 for limb mesenchymal derivatives markers (*Prrx1, Sox9, Col2a1, Col3a1, Lum*) and that GFP-/Pitx1-  
118 were enriched for satellite cluster markers including muscle (*Myod1, Ttn*), epithelium (*Wnt6, Krt17*),  
119 endothelium (*Cdh5, Cldn5*) and immune cells (*C1qa, Ccr1*) (**Fig. S2B, Supplementary Table S2**). Yet,  
120 the enrichment of these cell types does not preclude a fraction of GFP-/Pitx1- to be of mesenchymal  
121 origin as we found a weak but clear expression of some mesenchymal markers such as *Prrx1* or  
122 *Twist1* in this population (**Fig. S2C**)

123 We then assayed the *cis*-regulatory activities in GFP-/Pitx1- and GFP+/Pitx1+ hindlimb cells using  
124 the H3K27ac chromatin mark as a proxy for enhancer activities and C-HiC to determine the locus  
125 chromatin architecture (Rada-Iglesias et al. 2011). In GFP-/Pitx1- cells, neither *Pitx1* promoter nor  
126 its various enhancers, including *Pen*, were found enriched with H3K27ac (**Fig. 1E, 1F**). Moreover, the  
127 locus 3D structure is in a repressed state where *Pitx1* displays a strong interaction with the repressed  
128 *Neurog1* gene and no interaction with its cognate enhancers. This data show that GFP-/Pitx1-  
129 hindlimb cells display a complete absence of active regulatory landscape features. In contrast, in  
130 GFP+/Pitx1+ cells all known *Pitx1* enhancers as well as its promoter are strongly enriched in H3K27ac  
131 chromatin marks. Furthermore, in these cells *Pitx1* establishes strong contact with its cognate  
132 enhancers *PeIB, Pit, RA4* and *Pen* (**Fig. 1E, 1F**).

133 In summary, this data shows that within the hindlimb, classically considered as a *Pitx1* active tissue,  
134 8% of cells, from mesenchymal, immune, endothelium, muscle and epithelium origin, display an  
135 inactive *Pitx1 cis*-regulatory landscape and 3D architecture. Moreover, it suggests a *bimodal*  
136 regulatory behavior, where the *Pitx1* promoter, its associated enhancers and the locus 3D structure  
137 are all displaying an *active* mode or none of them are. We then further characterize *Pitx1* expression  
138 specificities within the hindlimb mesenchyme.

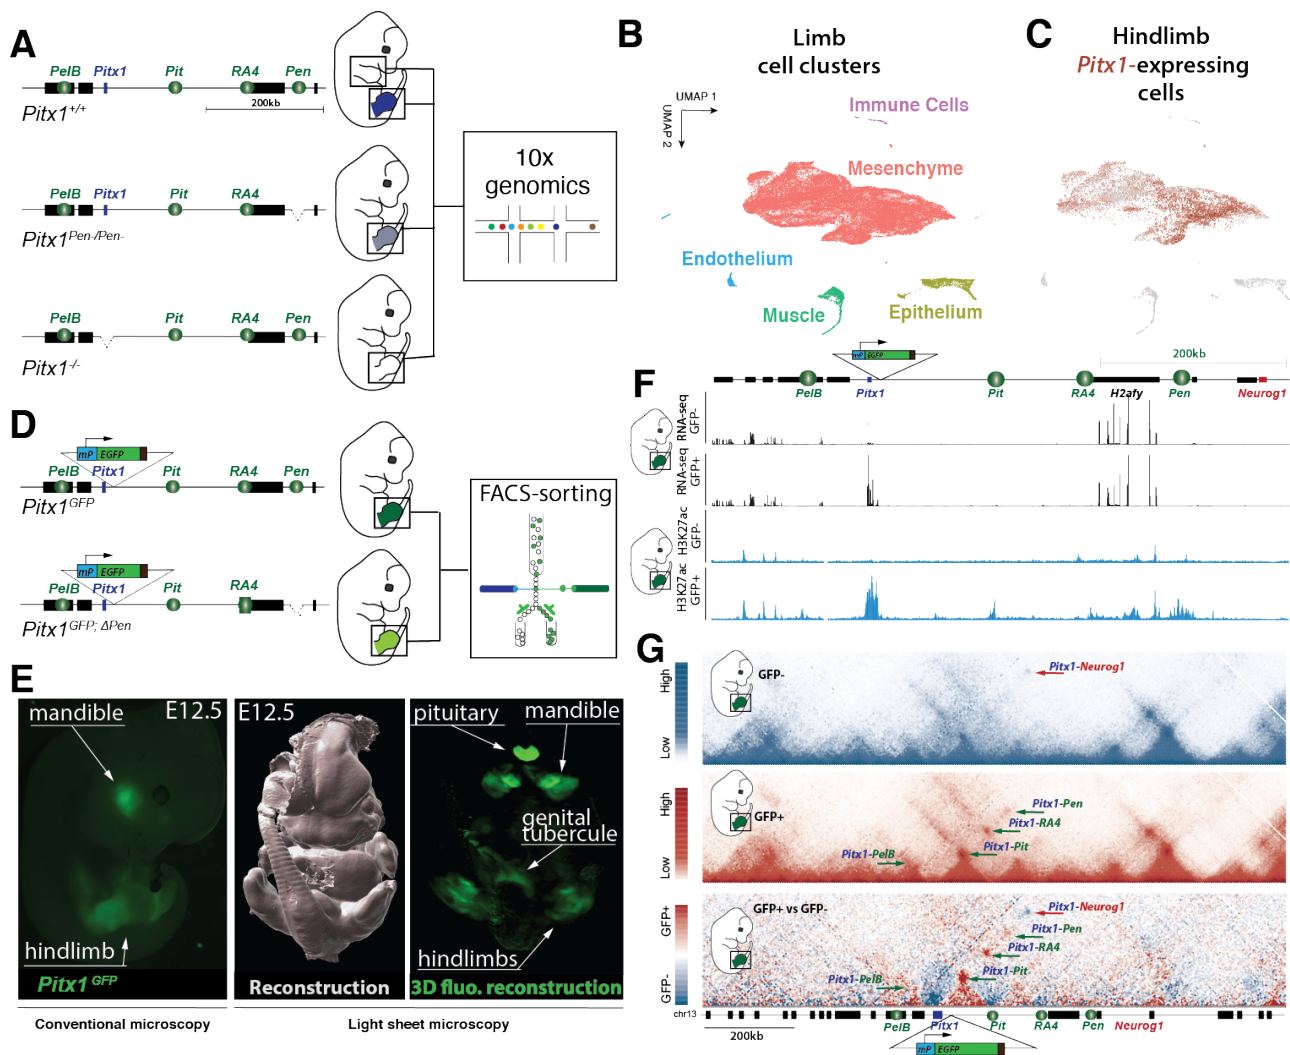

139

140 **Figure 1: Experimental setup, single cell clustering and regulatory sensor.** A. Wildtype, *Pitx1<sup>Pen/Pen-</sup>* and *Pitx1<sup>-/-</sup>*  
 141 transgenic E12.5 embryos were obtained by tetraploid complementation and single cell transcriptomic analyses were  
 142 produced from fore- and hindlimbs. B. UMAP clustering of wildtype and mutant fore- and hindlimbs shows one  
 143 mesenchymal as well as four satellite clusters. C. UMAP colored according to *Pitx1* expression shows expression only in  
 144 the mesenchyme cluster. D. A cassette containing a minimal  $\beta$ -globin promoter (*mP*) and an EGFP reporter gene is  
 145 integrated upstream of *Pitx1*. A secondary CRISPR/Cas9 targeting is then used to delete the *Pen* enhancer. E.  
 146 Conventional and light sheet microscopy reveal that *Pitx1<sup>GFP</sup>* embryos display EGFP expression domains corresponding  
 147 to the one of *Pitx1*. F. RNA-seq and H3K27ac of sorted hindlimb cells show that the sensor approach can separate *Pitx1*  
 148 active (GFP+) and inactive (GFP-) regulatory landscapes. G. The 3D structure of active and inactive landscapes in the  
 149 hindlimbs is fundamentally different. GFP+ cells bear chromatin interactions between *Pitx1* and its associated  
 150 enhancers. GFP- cells do not display these interactions but a strong contact between *Pitx1* and *Neurog1*.  
 151

## 152 Hindlimb proximal cell clusters express *Pitx1* at higher level

153 To characterize *Pitx1* transcription within mesenchymal subpopulations, we first re-clustered  
 154 mesenchymal cells from all datasets. From this analysis, we could define nine clusters (Fig. 2A). We  
 155 first observed that their distribution in the UMAP space is strongly influenced by the limb proximo-  
 156 distal axis, as illustrated by *Shox2* (proximal marker) and *Hoxd13* (distal marker) transcript  
 157 distribution (Fig. 2B). We further annotated the clusters according to the expression of known  
 158 marker genes. In the proximal limb section, we identified four clusters. First, we found an

159 undifferentiated **Proximal Proliferative Progenitors** cluster which is characterized by high expression  
160 of proliferative marker genes (**PPP**: *Shox2+*, *Hist1h1d+*, *Top2a+*). We then identified a **Tendon**  
161 **Progenitor** cluster (**TP**: *Shox2+*; *Osr1+*; *Scx+*) and an **Irregular Connective Tissue** cluster which  
162 includes muscle connective tissue and ultimately patterns tendons and muscles (**ICT**: *Shox2+*; *Osr1+*,  
163 *Dcn+*, *Lum+*, *Kera+*, *Col3a1+*)(Besse et al. 2020). Finally, in the proximal limb we observed a single  
164 cluster of **Proximal Condensations** that will give rise to proximal limb bones (**PC**: *Tbx15+*; *Sox9+*;  
165 *Col9a3+*). In the distal limb, we observed the presence of two undifferentiated distal mesenchyme  
166 (*Msx1+*) clusters: one that we classified as **Distal Proliferative Progenitors** (**DPP**: *Hoxd13+*; *Msx1+*;  
167 *Hist1h1d+*) as it displays a strong expression of proliferation markers, while the other is defined as  
168 **Distal Progenitors** (**DP**: *Hoxd13+*; *Msx1+*). Also, in the distal limb, we identified, two more  
169 differentiated clusters: **Early Digit Condensations** (**EDC**: *Hoxd13+*; *Sox9+*) and **Late Digit**  
170 **Condensations** (**LDC**: *Irx1+*). Finally, in-between proximal and distal regions (*Shox2+* and *Hoxd13+*),  
171 we found a cluster of condensating cells that we considered to be the **Mesopodium** (**Ms**: *Sox9+*;  
172 *Foxcl+*, *Gdf5+*) and that thus corresponds to ankles or wrists (**Fig. 2C-D, Supplementary Table S1**).  
173 To better understand the links between the different clusters, we ran an RNA velocity analysis in  
174 the hindlimb dataset (**Fig. 2E**) (La Manno et al. 2018; Bergen et al. 2020). We found that in the  
175 proximal limb a set of *Irx5*-expressing cells located within the PPP and ICT clusters are progenitor  
176 for the more differentiated proximal clusters such as TP and PC (**Fig2D, 2E**) (Li et al. 2014) . In the  
177 distal limb, DP and DPP clusters appear to be progenitor for EDC and then LDC. The Mesopodium  
178 cluster originates from both proximal (PPP-ICT) and distal (DP-DPP) progenitor clusters, confirming  
179 its proximo-distal origin.  
180 We then asked whether *Pitx1* is differentially expressed among clusters in hindlimb wildtype.  
181 Overall, we found *Pitx1* expressed in all mesenchymal clusters, yet with a proximal preference (**Fig.**  
182 **2D, 2F-G**). We then classified *Pitx1* expressing cells in three categories: non/low-expressing (21 % of  
183 the hindlimb wildtype cells), mild-expressing (40 % of cells), and high-expressing (39 % of cells) (**Fig.**  
184 **2F-G**). Expectedly, we found that a majority of high expressing cells are located in proximal clusters  
185 (PPP, TP, ICT, PC) and a majority of mild-expressing cells in distal clusters (DP, DPP, EDC, LDC) (**Fig.**  
186 **2F-H**). We also observed that the Ms cluster, previously identified as a cluster originating from the  
187 proximal and distal cell-types, is formed by a similar distribution of high-expressing (proximal) and  
188 mild-expressing (distal) cells in line with a proximo-distal origin (**Fig 2H**).



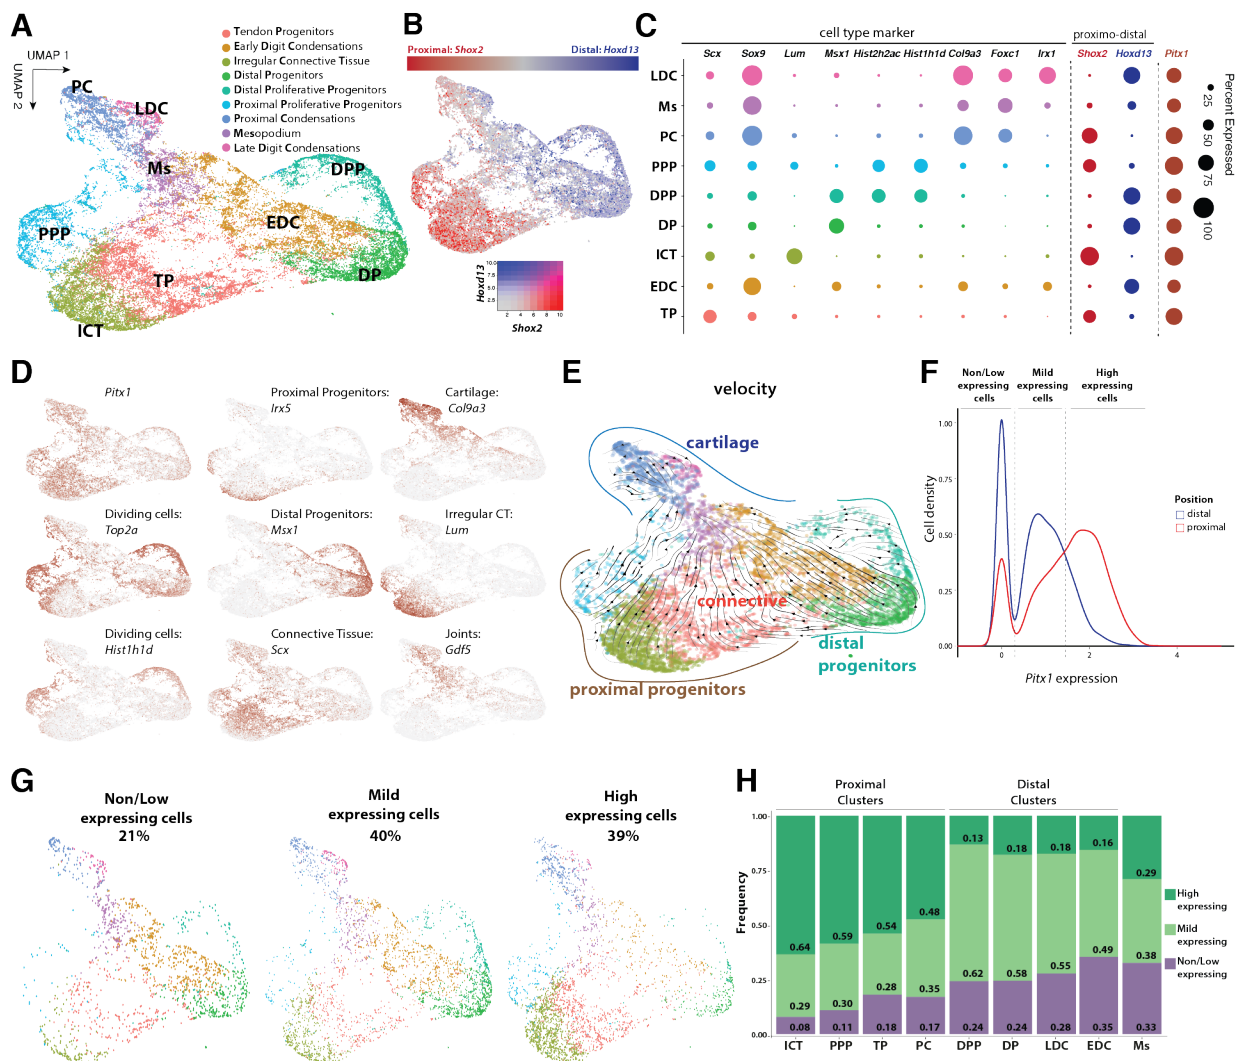

189

190 **Figure 2: *Pitx1* expression in hindlimbs: A.** UMAP of the re-clustering of mesenchymal cells from all datasets. **B.**  
 191 Distribution of *Shox2* (proximal) and *Hoxd13* (distal) marker. **C.** Representative marker genes for each cluster. The dot  
 192 size corresponds to the percentage of cells that express a given marker in the hindlimb wildtype dataset. **D.** Expression  
 193 distribution of selected marker genes across the UMAP **E.** RNA-velocity analysis of hindlimb wildtype mesenchymal  
 194 clusters. Note that the different differentiated cell cluster (upper part) derive from proximal and distal progenitors'  
 195 clusters (bottom part). **F.** *Pitx1* expression density plot in the proximal (red line) and distal clusters (green line) in the  
 196 hindlimb wildtype dataset. Definition of the three types of *Pitx1*-expressing cells: non/low- (<0.3 *Pitx1* expression levels),  
 197 mild- (0.3-1.4), high- expressing (>1.4). **G.** Hindlimb wildtype cells distribution across the clusters in the UMAP  
 198 space based on their *Pitx1* levels of transcription. **H.** Hindlimb wildtype cells proportions according to *Pitx1* expression level  
 199 across mesenchymal clusters.

200

## 201 *Pitx1* expression levels associate with global change in regulatory landscape acetylation

202 Next, we explored how cells can achieve distinct *Pitx1* transcriptional outputs. Practically, we asked  
 203 whether high- and mild-expressing cells use a distinct *Pitx1* enhancer repertoire to account for the  
 204 different expression levels. We sorted the two cell populations from *Pitx1*<sup>GFP</sup> hindlimbs by GFP  
 205 intensities: GFP<sup>+</sup> (mild-expressing) and GFP<sup>++</sup> (high-expressing) and performed H3K27ac ChIP-seq  
 206 on the two positive populations (**Fig. 3A** and **Fig. S3**). As expected from the single-cell analysis, high-  
 207 expressing GFP<sup>++</sup> cells were mostly derived from proximal limbs as demonstrated by the anterior

208 activity of the *HoxA* and *HoxD* clusters and by *Shox2* activity (Fig. 2G, 3B, 3C and Fig. S3). In contrast,  
 209 mild-expressing cells GFP<sup>+</sup> - where enriched for distal cell markers such as *Hoxa13*, *Evx1*, *Msx1* and  
 210 *Hoxd13* and *Evx2* (Fig. 3C, Fig. S3).

211 In both mild- and high-expressing cells, the previously characterized *Pitx1* enhancer repertoire -  
 212 *PelB*, *Pit*, *RA4* and *Pen* - was found marked by H3K27ac. Yet, in high-expressing cells, stronger  
 213 H3K27ac signal was found at these elements concomitantly with a drastic increase at two specific  
 214 regions: the *Pitx1* proximal promoter region (PPPR) and the region A (*regA*) (Fig. 3D and 3E)  
 215 (Kragesteen et al. 2018). This data shows that *Pitx1* regional expression differences across hindlimbs  
 216 associate with a progressive increase of its *cis*-regulatory landscape activity rather than different  
 217 repertoires of enhancers. This results further re-enforce the idea that the fundamental unit of *Pitx1*  
 218 regulation is the landscape as a whole rather than individual enhancers.

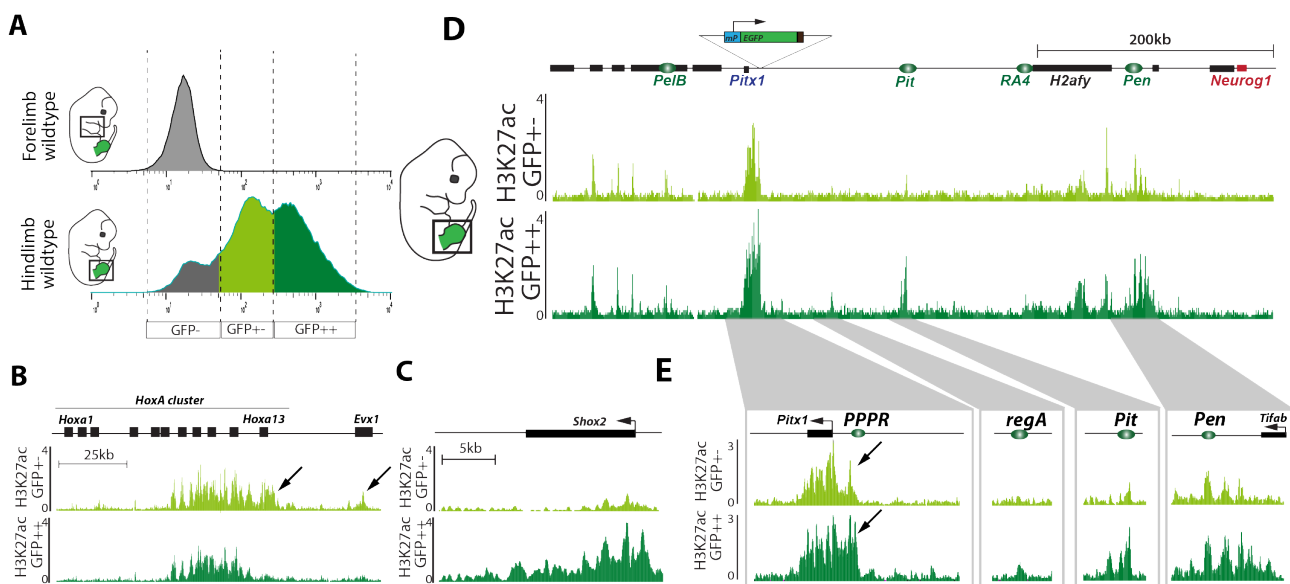

219  
 220 **Figure 3: High- and mild-expressing *Pitx1* regulatory landscape activities:** **A.** FACS sorting of wildtype *Pitx1*<sup>GFPs/GFPs</sup>  
 221 forelimb and hindlimbs. Note the apparent EGFP high-(dark green) and mild-expressing (light green) populations. **B.**  
 222 H3K27ac ChIP-seq in mild- and high-expressing hindlimb cell populations at the *HoxA* cluster. Note the distal *Hoxa13*  
 223 and *Evx1* genes activities (black arrows) in the mild active cells. **C.** H3K27ac ChIP-seq at the *Shox2* locus. Note the activity  
 224 in the highly active cells. **D.** H3K27ac ChIP-seq at the *Pitx1* locus. Note that enhancers are active in both mild and high  
 225 expressing cells, yet with a few regions marked only in high-expressing cells. **E.** H3K27ac profile on *Pitx1* gene body,  
 226 *Pitx1* Proximal Promoter Region (PPPR, see black arrow), region A (*regA*), *Pit* and the *Pen* enhancer.

### 227 ***Pen* deletion increases *Pitx1* non/low-expressing cells and alters limb cell composition**

229 Seeing the coordination between regulatory units at the locus to modulate gene expression we  
 230 sought to test how the deletion of one of them influences the overall unity of the locus. Therefore,  
 231 we took advantage of the *Pitx1* EGFP sensor and scRNA-seq to track how the homozygous deletion of  
 232 the *Pen* enhancer affects the hindlimb *Pitx1* locus activity. Using scRNA-seq, we found that the *Pen*  
 233 deletion induces a significant 29% loss of *Pitx1* expression (adjusted p-value=1.75e-96(Wilcoxon Rank

234 Sum test)) featured by a decrease in *Pitx1* high-expressing cells and a strong increase in low/non-  
235 expressing cells (**Fig. 4A**). Across hindlimb mesenchymal cells, the proportion of non/low-expressing  
236 cells was indeed raised from 21% in wildtype to 35% in *Pitx1<sup>Pen-/Pen-</sup>*. We observed a similar effect  
237 when we quantified EGFP fluorescence of *Pitx1<sup>GFP;ΔPen</sup>* mutant hindlimbs where high-fluorescent cells  
238 are lost and low/non-fluorescent cells are increased (**Fig. 4B-C**). In this case, the proportion of GFP-  
239 cells raised from 8% in *Pitx1<sup>GFP</sup>* to 16% in *Pitx1<sup>GFP;ΔPen</sup>* at E12.5 and from 12% to 29% at E13.5 (**Fig. S4A-**  
240 **B**). Yet, from the fluorescence distribution, it appears that a higher average EGFP level is visible within  
241 the GFP- gating, thereby indicating the presence of a higher proportion of low-expressing cells (**Fig.**  
242 **S4A-B**). In summary, the two approaches show that behind the weak average loss of *Pitx1* expression,  
243 a strong increase of non/low-expressing cells in mutant hindlimbs could account for the clubfoot  
244 phenotype seen in these animals (Kragesteen et al. 2018).

245 We further asked if this alteration in expression was equally distributed among various hindlimb cell-  
246 types or if some populations were more specifically affected. All clusters with the exception of the  
247 Ms and the LDC showed a significant loss of *Pitx1* expression ranging from 24% to 39% (**Fig. 4D**). With  
248 respect to the proportion of non/low-expressing cells, we saw that proximal clusters showed a  
249 preferential 2.1-fold enrichment of non/low-expressing cells (13% to 28%) in comparison with distal  
250 cells (1.6-fold, 29% to 45%) (**Fig. S5A-B**). We then computed the increase of non/low-expressing *Pitx1*  
251 cells in each cluster and saw that two proximal clusters in particular, ICT and the PPP, showed a 3.5-  
252 and 2-fold increase in *Pitx1* non/low-expressing cells, respectively. It is important to note that in both  
253 clusters the vast majority of cells usually express *Pitx1* at a high level (**Fig. 2H, S6**). Other clusters  
254 showed 1.5- to 1.8-fold increase in *Pitx1* non/low-expressing cells. In conclusion, we found that  
255 proximal, high-expressing clusters are more affected by the enhancer deletion than distal, mild-  
256 expressing clusters. We then investigated if this differential alteration of *Pitx1* expression among  
257 hindlimb cell population affected the proportion of cells within the clusters.

258 As a positive control for the effect of *Pitx1* loss-of-function in *Pitx1<sup>Pen-/Pen-</sup>* embryos, we took  
259 advantage of two datasets that do not express *Pitx1* at all: wildtype forelimbs and *Pitx1<sup>-/-</sup>* hindlimbs.  
260 First, by comparing wildtype fore- and hindlimbs, we did not observe any significant change in the  
261 proportion of cell-types in either tissue, suggesting that the developmental origin of their cell  
262 populations is identical despite the obvious structural differences between arms and legs (**Fig. 4E, 4F**).  
263 In contrast, *Pitx1<sup>-/-</sup>* hindlimbs display a heterochronic phenotype, featuring an increase in progenitor  
264 cells in both the proximal and distal regions of the limb (PPP and DPP) while a concurrent decrease is  
265 seen in several differentiated cell types in proximal and distal limbs (ICT, PC, Ms and LDC) (**Fig. 4E,**

266 **4F)**. Remarkably, the loss of the *Pen* enhancer resulted in a similar effect but only in the proximal limb  
267 cell clusters (**Fig. 4E and 4F**). Specifically, the proportion of PPP cells increased in *Pitx1*<sup>Pen-/Pen-</sup>  
268 hindlimbs as the proportion of ICT cells decreased. This strong effect shows that the loss of *Pitx1* in  
269 these clusters is enough to perturbate the proportion of cells that compose them. Moreover, this  
270 data suggests that a failure to reach an appropriate cell-type specific gene expression level is at the  
271 basis of the clubfoot phenotype.

272 As *Pitx1* has been shown to have both indirect and direct downstream effects, we further investigated  
273 if we could detect such changes in *Pitx1*<sup>Pen-/Pen-</sup> hindlimbs. In particular, it has been shown that *Tbx4*  
274 mediates the *Pitx1*-effect on hindlimb buds growth rate (Duboc and Logan 2011). As anticipated, we  
275 found a clear downregulation of the *Tbx4* in all clusters with except of PC, Ms and LDC in both *Pitx1*  
276 <sup>-/-</sup> and *Pitx1*<sup>Pen-/Pen-</sup> hindlimbs (**Fig. S7A-C**). Moreover, in *Pitx1*<sup>Pen-/Pen-</sup> hindlimbs, the magnitude of *Tbx4*  
277 loss-of-expression followed the one of *Pitx1*. In particular, we saw a strong decrease of *Tbx4*  
278 expression and an increase of *Tbx4* non-expressing cells in ICT and PPP clusters. This suggests that in  
279 the case of the *Pen* deletion an important fraction of the pathological effect might be conveyed *via*  
280 *Tbx4*.

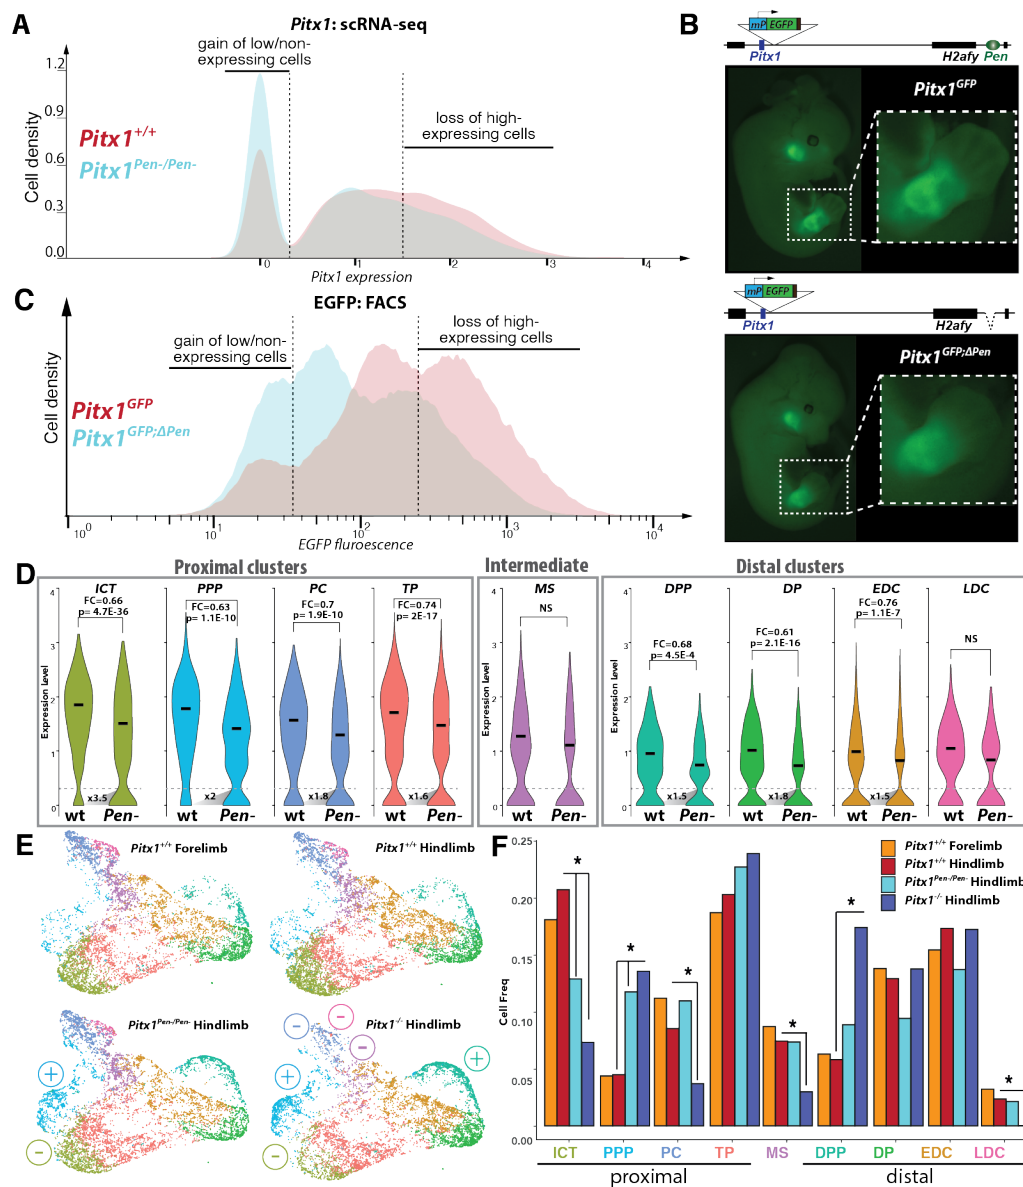

281

282 **Figure 4: Influence of the *Pen* deletion on *Pitx1* expression in hindlimb cell population.** **A.** *Pitx1* expression distribution  
 283 across wildtype (red) and *Pitx1*<sup>Pen-/Pen-</sup> (cyan) hindlimb cells shows an increased proportion of non/low-expressing mutant  
 284 cells and a decrease proportion of high-expressing cells. **B.** EGFP expression pattern in *Pitx1*<sup>GFP</sup> and *Pitx1*<sup>GFP;ΔPen</sup> in E12.5  
 285 embryos. **C.** FACS profile of *Pitx1*<sup>GFP</sup> (red) and *Pitx1*<sup>GFP;ΔPen</sup> (cyan) hindlimbs shows an increased number of EGFP non/low-  
 286 expressing cells as well as a decrease of EGFP high-expressing cells. **D.** *Pitx1* expression across all clusters in *Pitx1*<sup>GFP</sup> and  
 287 *Pitx1*<sup>GFP;ΔPen</sup> hindlimb. At the base of the distribution, the fold change in non/low-expressing cell number between  
 288 wildtype and mutant is shown. Note the strong loss of expression and the accumulation of non/low-expressing cells in  
 289 ICT and PPP clusters. **E.F.** UMAP (**E**) and quantification (**F**) of mesenchyme cell type proportions across conditions. (+)  
 290 and (-) symbols indicate increase or decrease in cell proportions, stars indicate p<0.05.

291

## 292 The *Pen* enhancer contributes to *Pitx1* regulatory landscape activation

293 The establishment of the active *Pitx1* chromatin landscape includes changes in 3D conformation and  
 294 the acetylation of specific *cis*-regulatory elements. Therefore, we asked whether the *Pen* enhancer  
 295 itself is required to establish these features and specifically if its deletion would impact them.

296 In sorted GFP+ and GFP- in *Pitx1*<sup>GFP;ΔPen</sup>, we first assessed using RNA-seq whether we could observe

297 similar changes in cellular identity upon *Pen* enhancer loss as the one previously described with  
298 scRNA-seq. As expected, we could observe in GFP- cells the accumulation of mesenchymal markers  
299 (*Prrx1*, *Twist1*) with a particular enrichment for ICT markers (*Col3a1*, *Col1a1*, *Col1a2*, *Lum*) (**Fig. 5A**,  
300 **Supplementary Table S3**). Because of the accumulation of cells losing *Pitx1* activity, and the  
301 consequent dilution of non-mesenchymal clusters, we also observed a decrease in satellite marker  
302 genes including epithelium (*Wnt6*, *Krt14*) and muscle (*Ttn*) markers. In GFP+ cells, we did not  
303 observed a clear change in identity markers suggesting that the cell type composition is similar  
304 between wildtype and mutant high-expressing cells (**Supplementary Table S4**). We then tested  
305 whether these high-expressing *escaping* cells display an adaptive mechanism to accommodate the  
306 *Pen* enhancer loss.

307 Specifically, we performed H3K27ac ChIP-seq in the escaping GFP+ cells and in the increased GFP-  
308 cell population. In GFP+ cells, we observed a distribution of H3K27ac over the landscape that was  
309 virtually identical to wildtype GFP+ hindlimbs cells, with the exception of the *Pen* enhancer itself  
310 (**Fig. 1E, 5B**). This result suggests that the *Pitx1* expressing cells in the *Pen* deletion background use  
311 the same enhancer repertoire as the wildtype expressing cells and thus, do not use an alternative  
312 regulatory landscape. Moreover, we observed the same average *Pitx1* expression level in wildtype  
313 and mutant GFP+ cells (**Supplementary Table S4**). In GFP- cells deleted for *Pen*, in contrast to  
314 wildtype cells, we observed ectopic acetylation of the *Pitx1* promoter as well as of the *RA4* and *PeIB*  
315 enhancers (**Fig. 5C**). These activities are likely caused by the relocation in the GFP- gating of cells  
316 that would normally express *Pitx1* but failed to establish a fully active landscape in the absence of  
317 *Pen*. As expected from the marginal increase in EGFP fluorescent cells previously described (**Fig. 4C**,  
318 **S4**), we also observed a marginal but significant increase in *Pitx1* expression (FC=1.6, padj=0.0026)  
319 far from the expression level observed in transcriptionally active cells (**Fig. 5C, Supplementary Table**  
320 **S3**).

321 We then measured how the lack of *Pen* affects the locus 3D structure dynamics in *Pitx1*<sup>GFP; $\Delta$ Pen</sup>  
322 hindlimbs. First, GFP+ and GFP- *Pitx1*<sup>GFP; $\Delta$ Pen</sup> hindlimb cells displayed differences similar to their  
323 wildtype *Pitx1*<sup>GFP</sup> active and inactive counterparts. This suggests that escaping high-expressing  
324 hindlimb *Pitx1*<sup>GFP; $\Delta$ Pen</sup> cells do not require *Pen* to establish an active 3D conformation (**Fig. 1F, 5D**,  
325 **S8A**). We thus asked whether these cells bare an alternative chromatin structure than wildtype ones  
326 to compensate for the loss of *Pen*. By comparing wildtype and *Pen*-deleted GFP+ cells we saw no  
327 major differences (**Fig. 5E, S8B**). Yet, using virtual 4C, we saw a slight reduction of contact between

328 the *Pitx1* promoter and *Pit/RA4* in GFP+ cells (Fig. 5F). This suggests that the remaining high-  
 329 expressing cells do not necessarily undergo a strong adaptive structural response to the loss of *Pen*  
 330 to ensure high *Pitx1* expression. Finally, we asked whether the relocated *Pitx1*<sup>GFP;ΔPen</sup> GFP- non-  
 331 expressing cells, that bear ectopic promoter and enhancer acetylation, also display features of an  
 332 active 3D structure (Fig. 5G, S8C). However, we did not observe any change in the *Pitx1* locus  
 333 conformation in these cells in comparison to wildtype non-expressing cells. This shows that despite  
 334 bearing some regulatory activity, the locus is unable to undertake its active 3D structure and  
 335 therefore to efficiently transcribe *Pitx1*. In conclusion, the *Pen* enhancer is necessary to ensure that  
 336 all the cells with active enhancers at the *Pitx1* locus undergo a robust transition toward a structurally  
 337 and transcriptionally active landscape (Fig. 6).

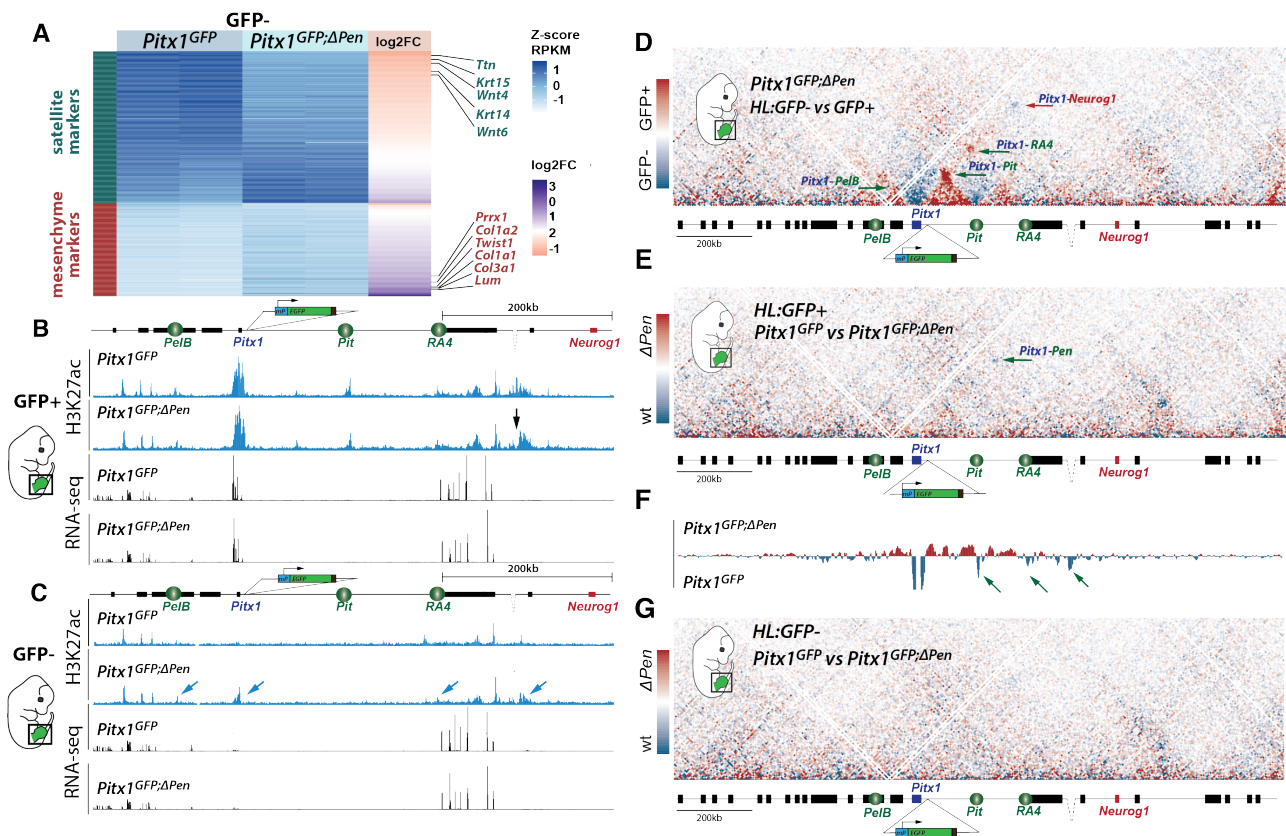

338

339 **Figure 5: Single enhancer deletion results in inefficient regulatory landscape activation.** A. Log2 fold change and RPKM  
 340 of mesenchymal (orange) and satellite (darkgreen) marker genes in *Pitx1*<sup>GFP</sup> and *Pitx1*<sup>GFP;ΔPen</sup> GFP- hindlimbs cells. Note  
 341 the decrease in satellite markers and the increase in mesenchymal markers in *Pitx1*<sup>GFP;ΔPen</sup> GFP- cells B. H3K27ac ChIP-  
 342 seq and RNA-seq at the *Pitx1* locus in GFP+ hindlimb cells in *Pitx1*<sup>GFP;ΔPen</sup> background. Note the loss of the *Pen* enhancer  
 343 region (black arrow). C. H3K27ac ChIP-seq and RNA-seq at the *Pitx1* locus in GFP- hindlimb cells in *Pitx1*<sup>GFP;ΔPen</sup>  
 344 background. Note the acetylation of *Pitx1* promoter and enhancers cells (blue arrows) and the weak *Pitx1* transcription.  
 345 D. C-HiC in subtraction between GFP- and GFP+ sorted *Pitx1*<sup>GFP;ΔPen</sup> hindlimb (HL) cells. E. C-HiC in subtraction between  
 346 *Pitx1*<sup>GFP</sup> GFP+ hindlimb cells and *Pitx1*<sup>GFP;ΔPen</sup> GFP+ cells. F. Subtraction track of virtual 4C between *Pitx1*<sup>GFP</sup> and  
 347 *Pitx1*<sup>GFP;ΔPen</sup> GFP+ hindlimb cells from the *Pitx1* viewpoint. Note the loss of interaction between *Pitx1* and its telomeric  
 348 enhancers (*Pit*, *RA4* and *Pen*). G. C-HiC in subtraction between *Pitx1*<sup>GFP</sup> GFP- hindlimb cells and *Pitx1*<sup>GFP;ΔPen</sup> GFP- cells.

349

## 350 Discussion

351

352 In this work we have shown that hindlimb cells display several states of *Pitx1* regulatory activities.

353 In active cells, all enhancers are marked with the active H3K27ac chromatin modification and are

354 contacting the *Pitx1* promoter. In contrast, in inactive cells, we could not observe partial regulatory

355 activities, i.e. neither enhancer acetylation nor enhancer-promoter interactions. This shows that the

356 locus follows a bimodal behavior where the regulatory landscape as a whole acts on *Pitx1*

357 transcription. Indeed, a common set of coordinated enhancers are active in both proximal *Pitx1*

358 high-expressing and distal *Pitx1* low-expressing cells. In fact, the *Pitx1* regulatory landscape acts here

359 similarly to what was previously define as a holo-enhancer, where the whole region seems to work

360 as a *coherent regulatory ensemble* (Marinic et al. 2013). In this perspective, *Pitx1* expression levels

361 are adjusted by the entire landscape. This is what we observed in high *Pitx1*-expressing proximal

362 cells where the same enhancer set than in distal cells displays a higher enrichment for active

363 H3K27ac chromatin mark along with a few proximal-specific regions that are more enriched for

364 H3K27ac.

365 Here we have tested how the loss of one the regulatory element, the *Pen* enhancer, affects the

366 establishment of the active landscape. As some *escaping* cells can induce *Pitx1* regulatory landscape

367 *activation* without *Pen*, many very low to non *Pitx1*-expressing cells accumulate in hindlimbs. The

368 latter cells bear high enrichment of H3K27ac at the *Pitx1* promoter and at several of its enhancers

369 (**Fig. 6**). However, despite the presence of this active modification, the *Pitx1* locus does not adopt

370 an active 3D chromatin folding but maintains the hallmarks of its inactive configuration. In fact,

371 these accumulated low/non-expressing cells are seemingly stuck in a *limbo* between activity and

372 repression and show the importance of the coordinated action of enhancer activity and 3D

373 chromatin changes to achieve sufficient transcriptional strength. Therefore, we hypothesize that

374 the role of *Pen* is not to act as a pattern-defining enhancer but rather as a support enhancer that

375 ensures a robust transition of cells towards a fully active landscape and therefore a strong *Pitx1*

376 transcription. In fact, *Pen* is a good model to understand the fundamental role of many enhancers

377 that were characterized with a diverging activity than the gene they control (Visel et al. 2007; Ruf et

378 al. 2011; Symmons and Spitz 2013). This “class” of enhancers would therefore govern the

379 cooperativity of the regulatory landscape of their respective locus without defining by themselves

380 its expression specificities.

381 Changes in the number of cells that express *Pitx1* in the hindlimb have strong phenotypical



382 consequences. In fact, the complete loss of *Pitx1* induces a strong increase in proximal and distal  
383 progenitor cells concomitantly with a loss of differentiated cell types, overall altering the proportion  
384 of specific cell clusters in hindlimbs. The global increase in progenitors indicates a heterochrony in  
385 limb development that ultimately results in a reduction of the limb size and the loss of some limb  
386 structures such as the patella. In the case of the *Pen* enhancer deletion, we saw a dramatic  
387 enrichment of *Pitx1* low/non-expressing cells in PPP and ICT clusters, two clusters where cell  
388 numbers were proportionally altered. This cellular proportion alteration might be mediated *via Tbx4*  
389 which is lost in these clusters and was shown to be important for limb outgrowth (Duboc and Logan  
390 2011). Here, the particularly strong effect of the *Pen* deletion on the ICT cell proportion pinpoints  
391 these cells as the origin of the clubfoot phenotype seen in mice lacking the enhancer. In fact, ICT  
392 that comprises muscle connective tissue, has been reported as a major driver of limb morphogenesis  
393 and our data suggest that it might be at the base of the clubfoot phenotype (Besse et al. 2020;  
394 Helmbacher and Stricker 2020). Finally, despite lacking *Pitx1* expression as well, forelimb cell  
395 clusters are present in the same proportion as hindlimb ones. This suggests that the role of *Pitx1* in  
396 hindlimb is mirrored by other genes in forelimbs, such as *Tbx5*, that account for a normal  
397 harmonious outgrowth of the various cell populations. Indeed, *Tbx5* loss of expression in the ICT  
398 population alters muscle and tendons patterning causing the mice to hold the paw in a supine  
399 position, leading them to walk on the edge or dorsal surface of the paw, resembling a clubfoot  
400 phenotype (Besse et al. 2020).

401 Our characterization of a single enhancer loss-of-function mutant at a cell subpopulation levels  
402 opens the way to study the effect of other regulatory mutations with the same resolution and, in  
403 particular, of gain-of-function mutations. Such approaches will enable to select particular cell-  
404 subpopulations that show ectopic expression in comparison to neighboring cells that bear the same  
405 mutation but no ectopic expression. This will facilitate a precise definition of features that are  
406 permissive for transcriptional gain-of-function and will be an important tool to further investigate  
407 the relationship between 3D structure, chromatin modifications and gene transcriptional activation.

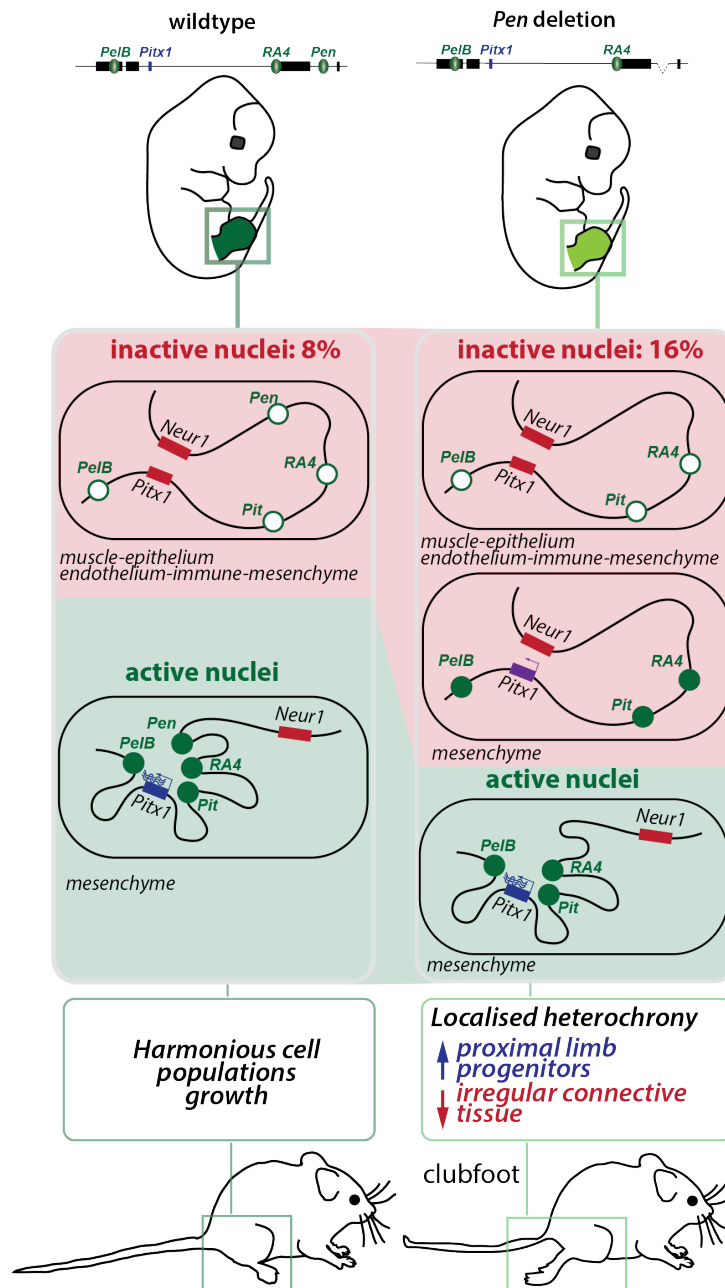

408

409 **Figure 6: Model.** In wildtype hindlimb tissues (left panel) 8% of the nuclei, mostly in non-mesenchymal cell types, display  
 410 a completely repressed locus and 3D chromatin structure. In active nuclei, the situation is inverted with an active  
 411 regulatory landscape, an active 3D chromatin structure and strong *Pitx1* transcription. In contrast, in hindlimb lacking  
 412 the *Pen* enhancer (right panel), 16% of the cells are lacking *Pitx1* transcription. Among these cells, some display a  
 413 partially active regulatory landscape. These cells, that have failed to establish an active 3D structure and a strong *Pitx1*  
 414 transcription, are of mesenchymal origins with a preference for ICT. The remaining active cells in mutant hindlimbs  
 415 appear to display wildtype expression levels despite lacking an important enhancer. Generally, the effect of the  
 416 enhancer deletion on the limb outgrowth is a disharmonious proportion of cell type including a gain of PPP and a  
 417 decrease of ICT, leading to a clubfoot phenotype.

## 418 **METHODS**

### 419 **CELL CULTURE AND MICE**

#### 420 **CRISPR/Cas9 Engineered Alleles**

421 Genetically engineered alleles were generated using the CRISPR/Cas9 editing according to (Kraft et  
422 al. 2015). Briefly, sgRNAs were designed using the online software Benchling and were chosen based  
423 on predicted off-target and on-target scores. All sgRNAs and target genomic locations for CRISPR-  
424 Cas9 can be found in Supplementary Table S5. SgRNAs were then sub-cloned in the pX459 plasmid  
425 from Addgene and 8 µg of each vectors was used for mESCs transfection. mESCs culture and genetic  
426 editing followed standard procedure (Andrey and Spielmann 2017). To construct the *Pitx1<sup>GFP</sup>* mESCs  
427 clone, a the lacZ sensor from (Kragesteen et al. 2018) was adapted by exchanging the LacZ by an  
428 EGFP cassette. The sgRNA was designed to target CRISPR-Cas9 to chr13:55935371-55935390  
429 (Supplementary Table S5). Cells were transfected with 4µg of EGFP-cassette and 8µg of pX459  
430 vector containing the sgRNA.

#### 431 **Aggregation of mESC**

432 Embryos were generated by tetraploid complementation from G4 ESCs (George et al. 2007; Artus  
433 and Hadjantonakis 2011). Desired mESCs were thawed, seeded on CD1 feeders and grown for 2 days  
434 before the aggregation procedure. Donor tetraploid morula are from B6D2F1 background and  
435 embryos were transferred into foster CD1 female.

#### 436 **Animal Procedures**

437 All animal procedures were in accordance with institutional, state, and government regulations  
438 (Canton de Genève authorisation: GE/89/19).

#### 439 **Single-Cell RNA-seq dissociation**

440 Two replicates of fore and hindlimb buds of E12.5 wildtype embryos and hindlimb buds of mutant  
441 embryos (*Pitx1<sup>Pen-/Pen-</sup>*, *Pitx1<sup>-/-</sup>*) were micro-dissected and incubated for 12 minutes in 400µl trypsin-  
442 EDTA 0.25% (Thermo Fischer Scientific, 25300062), supplemented with 40µl of 5% BSA. During  
443 incubation tissues were disrupted by pipetting after 6 minutes of incubation and at the end of the  
444 12 minutes. Trypsin was then inactivated by adding 2x volume of 5% BSA and single cell suspension  
445 was obtained by passing cells in a 40µm cell strainer. Cells were then spun at 250g for 5 minutes at  
446 4° and resuspended in 1%BSA in PBS. Cells were then counted using an automatized cell counter  
447 and a 1% BSA 700cells/ul suspension was prepared. 10ul of this solution was used as input for the  
448 10X Genomics library preparation.

#### 449 **Single-Cell library preparation**

450 Single-cell libraries were prepared using the Chromium Single Cell 3' GEM, Library & Gel Bead Kit v3  
451 following the manufacture's protocol (10X Genomics, PN-1000075). Briefly, Gel beads in EMulsion  
452 (GEMs) are generated by combining Single Cell 3' v3 Gel Beads, a Master Mix containing cells, and  
453 Partitioning Oil onto Chromium Chip B. Incubation of the GEMs produced from the poly-adenylated

454 mRNA barcoded, full-length cDNA. Immediately, gel beads are dissolved and cDNA is amplified via  
455 PCR followed by library construction and sequencing. Libraries were paired-end sequenced on a  
456 HiSeq 4000. On average, 7000 cells were loaded on the Chromium Chip and between 25000-35000  
457 mean reads were obtained.

#### 458 **Whole-mount in situ hybridization (WISH)**

459 *Pitx1* WISH were performed on 40-45 somite stage mouse embryos (E12.5) using a digoxigenin-  
460 labeled *Pitx1* antisense riboprobe transcribed from a cloned *Pitx1* probe (PCR DIG Probe Synthesis  
461 Kit, Roche), as previously described in (Kragesteen et al. 2018).

#### 462 **Tissue collection and cell preparation for FACS-sorting**

463 Forelimb and hindlimb buds from embryos with 40-45 somites (E12.5) were dissected in cold PBS  
464 solution. After PBS removal, a single cell suspension was achieved by incubating the limb buds in  
465 400uL Trypsin-EDTA (Thermo Fischer Scientific, 25300062) for 12' at 37°C in a Thermomixer with a  
466 resuspension step at the 6' mark. After blocking with one volume of 5% BSA (Sigma Aldrich, A7906-  
467 100G), cells were passed through a 40µm cell strainer for further tissue disruption and another  
468 volume of 5% BSA was added to the cell strainer to pass leftover cells. Cells were then centrifuged  
469 at 400g for 5' at 4°C and, after discarding the supernatant, they were resuspended in 1% BSA for cell  
470 sorting. 5mM of NaButyrate were added to the BSA when planning for subsequent fixation for  
471 H3K27Ac-ChIP.

#### 472 **Cell sorting**

473 Cell populations were isolated using fluorescent-activated cell sorting (FACS) using the Beckman  
474 Coulter MoFlo Astrios with GFP laser (excitation wavelength 488nm). After removal of dead cells  
475 with Draq7 dye and removal of doublets, following standard protocol, cells were gated for sorting  
476 as can be seen in **FigS1A**. Flow cytometry analysis to obtained GFP histograms was performed with  
477 the FlowJo™ Software (version 10.6.1).

#### 478 **Cell processing for RNA-seq, ChIP-seq and Capture-HiC**

##### 479 ChIP and Capture-HiC

480 After sorting, cells were centrifuged for 5' at 400g at 4°C and supernatant was discarded. Cells for  
481 ChIP-seq and Capture-HiC were resuspended in 10% FCS/PBS and fixed in 1% formaldehyde for ChIP  
482 and 2% for Capture-HiC at room temperature. The fixation was blocked by the addition of 1.25M  
483 glycine, cells were isolated by centrifugation (1000g, at 4°C for 8'), resuspended in cold lysis buffer  
484 (10 mM Tris, pH 7.5, 10 mM NaCl, 5 mM MgCl<sub>2</sub>, 0.1 mM EGTA, Protease Inhibitor (Roche,  
485 04693159001)) and incubated on ice for 10' to isolate the cell nuclei. The nuclei were isolated by  
486 centrifugation (1000g, at 4°C for 3'), washed in cold 1X PBS, centrifuged again (1000g, at 4°C for 1')  
487 and stored frozen at -80°C after removal of the PBS supernatant.

##### 488 RNA-seq and library preparation

489 After sorting, cells were centrifuged for 5' at 400g at 4°C, supernatant was discarded and cells frozen  
490 at -80°C. Total RNA from 1,5 x10<sup>5</sup> cells was isolated using the RNeasy Micro Kit (QIAGEN, ID:74004)

491 following manufacturer's instructions and then stored frozen at -80°C. Total RNA was quantified  
492 with a Qubit (fluorimeter from Life Technologies) and RNA integrity assessed with a Bioanalyzer  
493 (Agilent Technologies). The SMART-Seq v4 kit from Clontech was used for the reverse transcription  
494 and cDNA amplification according to manufacturer's specifications, starting with 5 ng of total RNA  
495 as input. 200 pg of cDNA were used for library preparation using the Nextera XT kit from Illumina.  
496 Library molarity and quality was assessed with the Qubit and TapeStation using a DNA High  
497 sensitivity chip (Agilent Technologies). Libraries were pooled at 2 nM and loaded for clustering on a  
498 Single-read Illumina Flow cell for an average of 35 mio reads / library. Reads of 50 bases were  
499 generated using the TruSeq SBS chemistry on an Illumina HiSeq 4000 sequencer.

#### 500 ***ChIP-seq and library preparation***

501  $5 \times 10^5$  fixed nuclei were sonicated to a 200-500bp length with the Bioruptor Pico sonicator  
502 (Diagenode). H3K27Ac ChIP was (Diagenode C15410174) was performed as previously described  
503 (Lee et al. 2006; Paliou et al. 2019) with the addition of 5mM of Na-Butyrate to all buffers. Libraries  
504 were then prepared following the Illumina ChIP TruSeq protocol and sequenced as 50bp single-end  
505 reads on a illumina HiSeq 4000. Libraries were prepared starting with below <10ng quantities of  
506 ChIP-enriched DNA as starting material and processed with the Illumina TruSeq ChIP kit according  
507 to manufacturer specifications. Libraries were validated on a TapeStation 2200 (Agilent) and a Qubit  
508 fluorimeter (Invitrogen – ThermoFisher Scientific). Libraries were pooled at 2 nM and loaded for  
509 clustering on a Single-read Illumina Flow cell. Reads of 50 bases were generated using the TruSeq  
510 SBS chemistry on an Illumina HiSeq 4000 sequencer.

#### 511 ***Capture-HiC and library preparation***

512 3C libraries were prepared as previously described (Paliou et al. 2019). Briefly, at least  $1 \times 10^6$  fixed  
513 cells were digested using the DpnII restriction enzyme (NEB, R0543M). Chromatin was re-ligated  
514 with T4 ligase (Thermo Fisher Scientific), de-crosslinked and precipitated. To check the validity of  
515 the experiment, 500 ng of re-ligated DNA were loaded on a 1% gel along with undigested and  
516 digested controls. 3C libraries were sheared and adaptors ligated to the libraries according to the  
517 manufacturer's instructions for Illumina sequencing (Agilent). Pre-amplified libraries were  
518 hybridized to the custom-designed SureSelect beads (chr13: 54,000,001-57,300,000) (Kragestein et  
519 al. 2018)) and indexed for sequencing (50–100 bp paired-end) following the manufacturer's  
520 instructions (Agilent). Enriched libraries were pooled at 2 nM and loaded for clustering on a Paired-  
521 End Illumina Flow cell for an average of 215 mio reads/library. Reads of 100 bases were generated  
522 using the TruSeq SBS chemistry on an Illumina HiSeq 4000 sequencer.

### 523 **STATISTICAL ANALYSIS AND COMPUTATIONAL ANALYSIS**

#### 524 ***ChIP-seq***

525 Single-end reads were mapped to the reference genome NCBI37/mm9 using Bowtie2 version  
526 2.3.4.2 (Langmead and Salzberg 2012), filtered for mapping quality  $q \geq 25$  and duplicates were  
527 removed with SAMtools 1.9. Reads were extended to 250 bp and scaled (1 million/total of unique  
528 reads) to produce coverage tracks. BigWig files were visualized in the UCSC genome browser.

529

## 530 **RNA-seq**

531 Single-end reads were mapped to the mm9 reference genome using STAR mapper version 2.5.2a  
532 with default settings. Further processing was done according to (Paliou et al. 2019). BigWig files  
533 were visualized in the UCSC genome browser. Counting was done using R version 3.6.2 and  
534 differential expression was analyzed through the “DESeq2” R package. The DESeq2 R package was  
535 also used to produce heatmaps by subtracting from each gene value per condition, given by vst, the  
536 mean value of all conditions. Genes were picked according to adjusted p-value, all being significantly  
537 differentially expressed between conditions. *Pitx1* fold enrichment between WT GFP+ and GFP-  
538 populations was calculated normalizing the total normalized read count per million. Significance in  
539 the fold enrichment was calculated using a Student’s t.test (type 2, 1 tail), inputting the normalized  
540 counts from each condition (2 normalized counts per genetic background). Expression heatmaps  
541 were generated for satellite and mesenchymal markers as defined in Supplementary table S1. For  
542 visualization reasons, *Ccr5*, *Cldn5* and *Col2a1* were added as sub-cluster markers (endothelium  
543 immune and condensation) and the forelimb-specific marker *Tbx5* was removed from the marker  
544 list. Moreover, genes with expression less or equal to 1 RPKM in all 8 samples (GFP+ wildtype:  
545 replicate 1 and 2; GFP- wildtype: replicate 1 and 2, GFP+ mutant: replicate 1 and 2; GFP- mutant:  
546 replicate 1 and 2) were removed from the analysis. For the GFP- specific heatmap, we additionally  
547 removed all genes with less or equal to 1 RPKM in all 4 GFP- samples. The color of the expression  
548 heatmap corresponds to the z-score transformed RPKM values, using the mean and standard  
549 deviation per gene based on all 8 samples. Log2FC was calculated by averaging replicates RPKM for  
550 each datasets and dividing *Pitx1*<sup>GFP</sup> and *Pitx1*<sup>GFP; $\Delta$ Pen</sup> values.

## 551 **Capture-HiC and virtual 4C**

552 Paired-end reads from sequencing were mapped to the reference genome NCBI37/mm9 using with  
553 Bowtie2 version 2.3.4.2 (Langmead and Salzberg 2012) and further filtered and deduplicated using  
554 HiCUP version 0.6.1. When replicates were available, these were pooled through catenation (-cat in  
555 Python 2.7.11) before HiCUP analysis. Valid and unique di-tags were filtered and further processed  
556 with Juicer tools version 1.9.9 to produce binned contact maps from valid read pairs with MAPQ  $\geq$   
557 30 and maps were normalized using Knights and Ruiz matrix balancing, considering only the genomic  
558 region chr13: 54,000,001-57,300,000 (Knight and Ruiz 2013; Wingett et al. 2015; Durand et al. 2016).  
559 After KR normalization, maps were exported at 5kb resolution. Subtraction maps were produced  
560 from the KR normalized maps and scaled together across their subdiagonals. C-HiC maps were  
561 visualized as heatmaps, where contacts above the 99<sup>th</sup> percentile were truncated for visualization  
562 purposes. Further details about data processing can be accessed at (Kragestein et al. 2018). Virtual  
563 4C profiles were generated from the filtered hicup.bam files used also for Capture-HiC analysis. The  
564 viewpoint for the *Pitx1* promoter was set at coordinates chr13:55930001-55940000 (10kb bin) and  
565 contact analysis was performed over the entire genomic region considered for Capture-HiC (chr13:  
566 54,000,001-57,300,000). A contact pair is considered when one interaction fragment is in the  
567 viewpoint and its pair mate is outside of it. The interaction profile was smoothed by averaging over  
568 5kb intervals and was produced as a bedgraph file.

569

570

## 571 **SINGLE-CELL DATA ANALYSIS**

### 572 ***Processing of sequenced reads***

573 Demultiplexing, alignment, filtering barcode and UMI counting was performed with 10x Genomics  
574 Cell Ranger software (version 3.0.2) following manufacture's recommendations, default settings  
575 and mm10 reference genome (version 3.0.0, provided by 10X Genomics, downloaded in 2019). Cell  
576 Ranger outputs files for each dataset were processed using the velocity run10x shortcut from  
577 velocity.py tool (La Manno et al. 2018) (version 0.17.17) to generate a loom file for each sample,  
578 using as reference genome the one provided by 10X Genomics and the UCSC genome browser  
579 repeat masker .gtf file, to mask expressed repetitive elements. Each loom matrix, containing  
580 spliced/unspliced/ambiguous reads, was individually imported in R (version 3.6.2) with the Read  
581 Velocity function from the Seurat Wrappers package (version 0.2.0). In parallel, feature filtered  
582 output matrices obtained from Cell Ranger were individually loaded into R through the Read10X  
583 function of the Seurat package (version 3.2.0, (Stuart et al. 2019). Then, we combined the spliced,  
584 unspliced, ambiguous and RNA feature data in a single matrix for each dataset. Subsequently each  
585 matrix was transformed into a Seurat object using Seurat package. Therefore, for each sample we  
586 obtained for each sample a single Seurat object comprehend by four assays, three of them (spliced,  
587 unspliced and ambiguous) were used for downstream RNA velocities estimations and the RNA  
588 feature assay was used for downstream gene expression analysis between the samples, as described  
589 below.

### 590 ***Quality control and filtering***

591 Quality control and pre-processing of each Seurat object of our eight samples was performed  
592 attending to the following criteria. Cells expressing less than 200 genes were excluded. Additionally,  
593 we calculated the reads that mapped to the mitochondrial genome and we filtered out the cells  
594 with a mitochondrial content higher than 15%, since high levels of mitochondrial mRNA has been  
595 associated to death cells. Also, we excluded cells with a mitochondrial content lower than 1%, since  
596 we observed that belongs, in our datasets, to blood cells probably coming from the dissection  
597 protocol.

### 598 ***Individual dataset normalization, scaling and dimensional reduction***

599 After filtering, one by one we normalized the eight datasets following the default Seurat parameters  
600 for the LogNormalize method and applying it only to the RNA features assay. We next scaled it by  
601 applying a linear transformation and we calculated the most variable features individually for  
602 downstream analysis, using standard Seurat parameters. Scaled data was then used for principal  
603 component analysis (PCA), we used the 50 PCs established by default, and non-linear dimensional  
604 reduction by Uniform Manifold Approximation Projection (UMAP (Leland McInnes et al. 2018)), we  
605 used 1:50 dims as input.

### 606 ***Cell Doublet identification***

607 Pre-process and normalized datasets were individually screened for detection of putative doublet  
608 cells. Doublets in each dataset were also excluded using DoubletFinder R package (version 2.0.2)  
609 (McGinnis et al. 2019) as described in <https://github.com/chris-mcginnis-ucsf/DoubletFinder>. The  
610 doublet rate (nExp parameter) used was estimated from the number of cells captured and it is as

611 follows : HLWT replicate 1, nExp = 106; HLWT replicate 2, nExp = 123; FLWT replicate 1, nExp = 97;  
612 FLWT replicate 2, nExp = 116; HLPitx1<sup>-/-</sup> replicate 1, nExp = 104; HLPitx1<sup>-/-</sup> replicate 2, nExp = 122;  
613 HL<sup>Pen-/Pen-</sup> replicate 1, nExp = 118; HL<sup>Pen-/Pen-</sup> replicate 2, nExp = 116. The pK parameter was calculated  
614 following the strategy defined by (McGinnis et al. 2019) and is as follow: HLWT replicate 1, pK =  
615 0.12; HLWT replicate 2, pK = 0.005; FLWT replicate 1, pK = 0.09; FLWT replicate 2, pK = 0.04; HLPitx1<sup>-/-</sup>  
616 <sup>-/-</sup> replicate 1, pK = 0.04; HLPitx1<sup>-/-</sup> replicate 2, pK = 0.01; HL<sup>Pen-/Pen-</sup> replicate 1, pK = 0.005; HL<sup>Pen-/Pen-</sup>  
617 replicate 2, pK = 0.005. After filtering, we kept for downstream analysis the following number of  
618 cells for each dataset: HLWT replicate 1, 4143 cells; HLWT replicate 2, 4816 cells; FLWT replicate 1,  
619 3802 cells; FLWT replicate 2, 4521 cells; HLPitx1<sup>-/-</sup> replicate 1, 4049 cells; HLPitx1<sup>-/-</sup> replicate 2,  
620 4745 cells; HL<sup>Pen-/Pen-</sup> replicate 1, 4600 cells; HL<sup>Pen-/Pen-</sup> replicate 2, 4518 cells.

## 621 ***Merge of all datasets and normalization***

622 Once each dataset was individually filtered and doublets were removed, all datasets were merged  
623 in a unique Seurat object without performing integration to execute an ensemble downstream  
624 analysis of the eight datasets. No batch effect was observed later on in this merged dataset.  
625 Subsequently, we normalized our new and unique Seurat object applying the SCTransform  
626 normalization protocol (Hafemeister and Satija 2019), with default parameters, over the spliced  
627 assay.

## 628 ***Cell-cycle scoring and regression***

629 Since from the individual analysis of our dataset we observed a part of the variance was explained  
630 by cell-cycle genes, we examine cell-cycle variation in the merged dataset. To do so, we assigned to  
631 each cell a score based on its expression of a pre-determined list of cell cycle gene markers, following  
632 the strategy defined by (Tirosh et al. 2016) and by applying CellCycleScoring function implemented  
633 in Seurat. Subsequently, the evaluation of this results, we decided to regress out the cell-cycle  
634 heterogeneity. Therefore, we applied to our merged object the SCTransform normalization method,  
635 using the spliced assay as source, and adding to the default settings the cell-cycle calculated scores  
636 (S.Score and G2M.Scores) as variables to regressed.

## 637 ***Clustering***

638 After cell-cycle regression, cells were clustered using standard steps of the SCTransform Seurat  
639 workflow. Briefly, PCA (npcs = 50), UMAP (dims = 1:50) and nearest neighbors of each cell were  
640 calculated. Clusters were determined using Seurat FindClusters function with default parameters  
641 and a resolution of 0.2, in that way 10 clusters were defined. Identification of clusters identity was  
642 done by calculating the expression difference of each gene between each cluster and the rest of the  
643 clusters using the FindConservedMarkers function. We applied this function to each cluster (ident.1)  
644 using default parameters, only.pos = TRUE and setting as grouping variable the limb identity of the  
645 datasets, in that way we obtained a list of markers for each cluster independent of the limb sample.  
646 Clusters with similar marker were combined, therefore we finally worked with 5 clusters (**Fig 1B**):  
647 the mesenchyme (that contains 5 out of the 10 clusters), the epithelium (formed by 2 out of 10),  
648 and the immune cell cluster, the muscle and the endothelium clusters (composed by only 1 cluster  
649 each). We confirmed the expected identity markers were present in the new clustering by running  
650 the FindMarkers function with the following parameters logfc.threshold = 0.7; pseudocount.use =  
651 0; only.pos = TRUE; min.diff.pct = 0.15 and all other default parameters (Supplementary Table S1).



## 652 **Subsetting and Re-clustering**

653 Since the interest of this work was focus on the populations that in a wildtype hindlimb express  
654 *Pitx1* (**Fig 1C**), we subsetted the mesenchyme cluster. To have a better insight on the different cell-  
655 types that integrate it, we re-cluster the mesenchyme cluster. To do so, UMAP embedding was  
656 calculated with the following parameters: `dims = c(1:10)`, `n.neighbors = 15L`, `min.dist = 0.01`, `metric`  
657 `= "cosine"`, `spread = 0.5`, all other parameters were default. Cluster resolution after finding  
658 neighbors was established at 0.4 to reveal subpopulations. We observed 9 mesenchyme  
659 subpopulations (**Fig. 3A**) that we named according to their identity genes. Identity markers were  
660 found using FindMarkers on the RNA assay, setting `logfc.threshold = 0.3`, `pseudocount = 0`,  
661 `min.diff.pct = 0.1`, `only.pos = TRUE` and all other parameters as default (Supplementary Table S1).

## 662 **RNA-velocity analysis**

663 To perform the RNA velocity analysis on the hindlimb wildtype samples we subset the cells  
664 belonging to the 2 hindlimb wildtype replicates. This subsetted Seurat object was saved as h5Seurat  
665 file using SeuratDisk package (version 0.0.0.9013) and exported to be used as input of Scvelo  
666 (version 0.2.2) (<https://www.nature.com/articles/s41587-020-0591-3>) in Python (version 3.7.3).  
667 Then the standard protocol described in [scvelo](#) was followed. Standard parameters were used  
668 except `npcs = 10` and `n.neighbors = 15`, to be the same that we used for the UMAP embedding in  
669 Seurat.

## 670 **Differential Proportion analysis**

671 Statistical differential proportion analysis, to study the differences in clusters cell proportions  
672 between the different limb-type conditions, was performed in R using the source code published by  
673 (Farbehi et al. 2019) after generating the proportion tables in R. Null distribution was calculated  
674 using `n = 100,000` and `p = 0.1` as in the original reference. Pairwise comparisons were performed  
675 between the different condition tested.

## 676 **Proximal and distal cell classification**

677 Proximal, distal or NR attribute was given to each cluster based on its *Shox2* and *Hoxd13* expression.  
678 Therefore, ICT, TP, PPP and PC clusters were classified as proximal clusters, DP, DPP, EDC and LDC  
679 as distal ones. Meanwhile, Ms cluster that express both markers were not classify to any of them.  
680 This classification was added to the Seurat object metadata and used in downstream analysis.

## 681 ***Pitx1* density plot and cell classification by *Pitx1* expression**

682 *Pitx1* normalized expression values, from the RNA assay of the all dataset merged Seurat Object,  
683 were extracted in a data frame. This data frame was used to create a density plot using ggplot2  
684 package (version 3.3.2). From the overlay of *Pitx1* density distributions in the HLWT samples and  
685 the HL<sup>Pen-/Pen-</sup> we define the intersection point of 0.3 to classify cells in non/low-expressing and  
686 expressing cells. The second intersection point of 1.45 that subclassify these expressing cells in mild-  
687 and high- expressing cells was established based on the intersection of the HLWT proximal and distal  
688 cells (**Fig 2F**). Therefore, we classified as non/low- expressing cells those with *Pitx1* expression values  
689 `<0.3`, as mild-expressing those with *Pitx1* expressing values between `>0.3, <1.45` and as hig-

690 expressing cells those >1.45. This classification and *Pitx1* expression values were added as new  
691 columns to the Seurat object metadata and used in downstream analysis.

692

## 693 **Acknowledgments**

694 We thank Mylène Docquier, Brice Petit and Christelle Barraclough from the iGE3 sequencing facility.

695 We thank Jean-Pierre Aubry, Grégory Schneider and Cécile Gameiro from the Flow Cytometry

696 facility. We thank Nicolas Liaudet from the imaging facility and Stéphane Pàges and Laura Batti from

697 Advanced Light Sheet Imaging Center (ALiCe). We thank Leon Van Gulp, Sigmar Stricker, Pierre

698 Fabre, Quentin Lo Giudice, Lucille Delisle and Denis Duboule for discussions. We thank Michael

699 Robson, Anna Ramisch, Simon Braun and Christina Paliou for critical reading of the manuscript. We

700 thank all lab members for discussions and critical reading of the manuscript. This study was

701 supported by grants from the Swiss National Science Foundation (PP00P3\_176802) and from the

702 Boninchi Foundation.

703

## 704 **Data accessibility**

705 Sequencing data have been deposited at the GEO repository and will be available upon publication.

706

## 707 **Author Contributions**

708 G.A., O.B. and R.R. conceived the project. R.R., O.B., R.P. and A.R. performed the ESC targeting and

709 prepared the cells for aggregation. O.B. performed the Capture-HiC, CHIP-eq and RNA-seq

710 preparations and analyses. R.R. performed the scRNA-seq preparation and analyses. G.A., R.R., and

711 O.B. wrote the manuscript with input from the remaining authors.

## 712 **Declaration of Interests**

713 The authors declare no competing interests

714

715

## 716 References

- 717 Alvarado DM, McCall K, Aferol H, Silva MJ, Garbow JR, Spees WM, Patel T, Siegel M, Dobbs MB, Gurnett CA. 2011. Ptx1  
718 haploinsufficiency causes clubfoot in humans and a clubfoot-like phenotype in mice. *Human molecular genetics*  
719 **20**: 3943-3952.
- 720 Andrey G, Spielmann M. 2017. CRISPR/Cas9 Genome Editing in Embryonic Stem Cells. *Methods in molecular biology*  
721 **1468**: 221-234.
- 722 Artus J, Hadjantonakis AK. 2011. Generation of chimeras by aggregation of embryonic stem cells with diploid or  
723 tetraploid mouse embryos. *Methods in molecular biology* **693**: 37-56.
- 724 Bergen V, Lange M, Peidli S, Wolf FA, Theis FJ. 2020. Generalizing RNA velocity to transient cell states through dynamical  
725 modeling. *Nature biotechnology* **38**: 1408-1414.
- 726 Besse L, Sheeba CJ, Holt M, Labuhn M, Wilde S, Feneck E, Bell D, Kucharska A, Logan MPO. 2020. Individual Limb Muscle  
727 Bundles Are Formed through Progressive Steps Orchestrated by Adjacent Connective Tissue Cells during  
728 Primary Myogenesis. *Cell Rep* **30**: 3552-3565 e3556.
- 729 Chiu HS, Szucsik JC, Georgas KM, Jones JL, Rumballe BA, Tang D, Grimmond SM, Lewis AG, Aronow BJ, Lessard JL et al.  
730 2010. Comparative gene expression analysis of genital tubercle development reveals a putative appendicular  
731 Wnt7 network for the epidermal differentiation. *Dev Biol* **344**: 1071-1087.
- 732 DeLaurier A, Schweitzer R, Logan M. 2006. Ptx1 determines the morphology of muscle, tendon, and bones of the  
733 hindlimb. *Dev Biol* **299**: 22-34.
- 734 Duboc V, Logan MP. 2011. Ptx1 is necessary for normal initiation of hindlimb outgrowth through regulation of Tbx4  
735 expression and shapes hindlimb morphologies via targeted growth control. *Development* **138**: 5301-5309.
- 736 Durand NC, Shamim MS, Machol I, Rao SS, Huntley MH, Lander ES, Aiden EL. 2016. Juicer Provides a One-Click System  
737 for Analyzing Loop-Resolution Hi-C Experiments. *Cell systems* **3**: 95-98.
- 738 Farbehi N, Patrick R, Dorison A, Xaymardan M, Janbandhu V, Wystub-Lis K, Ho JW, Nordon RE, Harvey RP. 2019. Single-  
739 cell expression profiling reveals dynamic flux of cardiac stromal, vascular and immune cells in health and injury.  
740 *eLife* **8**.
- 741 George SH, Gertsenstein M, Vintersten K, Korets-Smith E, Murphy J, Stevens ME, Haigh JJ, Nagy A. 2007. Developmental  
742 and adult phenotyping directly from mutant embryonic stem cells. *Proc Natl Acad Sci U S A* **104**: 4455-4460.
- 743 Hafemeister C, Satija R. 2019. Normalization and variance stabilization of single-cell RNA-seq data using regularized  
744 negative binomial regression. *Genome biology* **20**: 296.
- 745 Helmbacher F, Stricker S. 2020. Tissue cross talks governing limb muscle development and regeneration. *Semin Cell Dev*  
746 *Biol* **104**: 14-30.
- 747 Infante CR, Park S, Mihala AG, Kingsley DM, Menke DB. 2013. Ptx1 broadly associates with limb enhancers and is  
748 enriched on hindlimb cis-regulatory elements. *Dev Biol* **374**: 234-244.
- 749 Knight PA, Ruiz D. 2013. A fast algorithm for matrix balancing. *Ima J Numer Anal* **33**: 1029-1047.
- 750 Kraft K, Geuer S, Will AJ, Chan WL, Paliou C, Borschiwer M, Harabula I, Wittler L, Franke M, Ibrahim DM et al. 2015.  
751 Deletions, Inversions, Duplications: Engineering of Structural Variants using CRISPR/Cas in Mice. *Cell Rep*  
752 doi:10.1016/j.celrep.2015.01.016.
- 753 Kragesteen BK, Spielmann M, Paliou C, Heinrich V, Schopflin R, Esposito A, Annunziatella C, Bianco S, Chiariello AM,  
754 Jerkovic I et al. 2018. Dynamic 3D chromatin architecture contributes to enhancer specificity and limb  
755 morphogenesis. *Nat Genet* **50**: 1463-1473.
- 756 Kvon EZ, Waymack R, Elabd MG, Wunderlich Z. 2021. Enhancer redundancy in development and disease. *Nat Rev Genet*  
757 doi:10.1038/s41576-020-00311-x.
- 758 La Manno G, Soldatov R, Zeisel A, Braun E, Hochgerner H, Petukhov V, Lidschreiber K, Kastri ME, Lonnerberg P, Furlan  
759 A et al. 2018. RNA velocity of single cells. *Nature* **560**: 494-498.
- 760 Lanctot C, Gauthier Y, Drouin J. 1999a. Pituitary homeobox 1 (Ptx1) is differentially expressed during pituitary  
761 development. *Endocrinology* **140**: 1416-1422.
- 762 Lanctot C, Lamolet B, Drouin J. 1997. The bicoid-related homeoprotein Ptx1 defines the most anterior domain of the  
763 embryo and differentiates posterior from anterior lateral mesoderm. *Development* **124**: 2807-2817.
- 764 Lanctot C, Moreau A, Chamberland M, Tremblay ML, Drouin J. 1999b. Hindlimb patterning and mandible development  
765 require the Ptx1 gene. *Development* **126**: 1805-1810.
- 766 Langmead B, Salzberg SL. 2012. Fast gapped-read alignment with Bowtie 2. *Nature methods* **9**: 357-359.
- 767 Lee TI, Johnstone SE, Young RA. 2006. Chromatin immunoprecipitation and microarray-based analysis of protein  
768 location. *Nature protocols* **1**: 729-748.
- 769 Leland McInnes, John Healy, Nathaniel Saul, Großberger L. 2018. UMAP: Uniform Manifold Approximation and  
770 Projection for Dimension Reduction. *The Journal of Open Source Software* doi:10.21105/joss.00861.

- 771 Li D, Sakuma R, Vakili NA, Mo R, Puvindran V, Deimling S, Zhang X, Hopyan S, Hui CC. 2014. Formation of proximal and  
772 anterior limb skeleton requires early function of *Ir3* and *Ir5* and is negatively regulated by *Shh* signaling. *Dev*  
773 *Cell* **29**: 233-240.
- 774 Marinic M, Aktas T, Ruf S, Spitz F. 2013. An integrated holo-enhancer unit defines tissue and gene specificity of the *Fgf8*  
775 regulatory landscape. *Dev Cell* **24**: 530-542.
- 776 McGinnis CS, Murrow LM, Gartner ZJ. 2019. DoubletFinder: Doublet Detection in Single-Cell RNA Sequencing Data Using  
777 Artificial Nearest Neighbors. *Cell systems* **8**: 329-337 e324.
- 778 Montavon T, Soshnikova N, Mascrez B, Joye E, Thevenet L, Splinter E, de Laat W, Spitz F, Duboule D. 2011. A regulatory  
779 archipelago controls *Hox* genes transcription in digits. *Cell* **147**: 1132-1145.
- 780 Nemec S, Luxey M, Jain D, Sung AH, Pastinen T, Drouin J. 2017. *Pitx1* directly modulates the core limb development  
781 program to implement hindlimb identity. *Development* doi:10.1242/dev.154864.
- 782 Osterwalder M, Barozzi I, Tissieres V, Fukuda-Yuzawa Y, Mannion BJ, Afzal SY, Lee EA, Zhu Y, Plajzer-Frick I, Pickle CS et  
783 al. 2018. Enhancer redundancy provides phenotypic robustness in mammalian development. *Nature* **554**: 239-  
784 243.
- 785 Paliou C, Guckelberger P, Schopflin R, Heinrich V, Esposito A, Chiariello AM, Bianco S, Annunziatella C, Helmuth J, Haas  
786 S et al. 2019. Preformed chromatin topology assists transcriptional robustness of *Shh* during limb development.  
787 *Proc Natl Acad Sci U S A* **116**: 12390-12399.
- 788 Petit F, Sears KE, Ahituv N. 2017. Limb development: a paradigm of gene regulation. *Nat Rev Genet* **18**: 245-258.
- 789 Rada-Iglesias A, Bajpai R, Swigut T, Brugmann SA, Flynn RA, Wysocka J. 2011. A unique chromatin signature uncovers  
790 early developmental enhancers in humans. *Nature* **470**: 279-283.
- 791 Ruf S, Symmons O, Uslu VV, Dolle D, Hot C, Ettwiller L, Spitz F. 2011. Large-scale analysis of the regulatory architecture  
792 of the mouse genome with a transposon-associated sensor. *Nat Genet* **43**: 379-386.
- 793 Stuart T, Butler A, Hoffman P, Hafemeister C, Papalexi E, Mauck WM, 3rd, Hao Y, Stoeckius M, Smibert P, Satija R. 2019.  
794 Comprehensive Integration of Single-Cell Data. *Cell* **177**: 1888-1902 e1821.
- 795 Symmons O, Spitz F. 2013. From remote enhancers to gene regulation: charting the genome's regulatory landscapes.  
796 *Philosophical transactions of the Royal Society of London Series B, Biological sciences* **368**: 20120358.
- 797 Thompson AC, Capellini TD, Guenther CA, Chan YF, Infante CR, Menke DB, Kingsley DM. 2018. A novel enhancer near  
798 the *Pitx1* gene influences development and evolution of pelvic appendages in vertebrates. *eLife* **7**.
- 799 Tirosh I, Izar B, Prakadan SM, Wadsworth MH, 2nd, Treacy D, Trombetta JJ, Rotem A, Rodman C, Lian C, Murphy G et al.  
800 2016. Dissecting the multicellular ecosystem of metastatic melanoma by single-cell RNA-seq. *Science* **352**: 189-  
801 196.
- 802 Visel A, Minovitsky S, Dubchak I, Pennacchio LA. 2007. VISTA Enhancer Browser--a database of tissue-specific human  
803 enhancers. *Nucleic acids research* **35**: D88-92.
- 804 Will AJ, Cova G, Osterwalder M, Chan WL, Wittler L, Brieske N, Heinrich V, de Villartay JP, Vingron M, Klopocki E et al.  
805 2017. Composition and dosage of a multipartite enhancer cluster control developmental expression of *Ihh*  
806 (Indian hedgehog). *Nat Genet* **49**: 1539-1545.
- 807 Wingett S, Ewels P, Furlan-Magaril M, Nagano T, Schoenfelder S, Fraser P, Andrews S. 2015. HiCUP: pipeline for mapping  
808 and processing Hi-C data. *F1000Research* **4**: 1310.
- 809

810

811 **Supplementary figure 1**

**A**

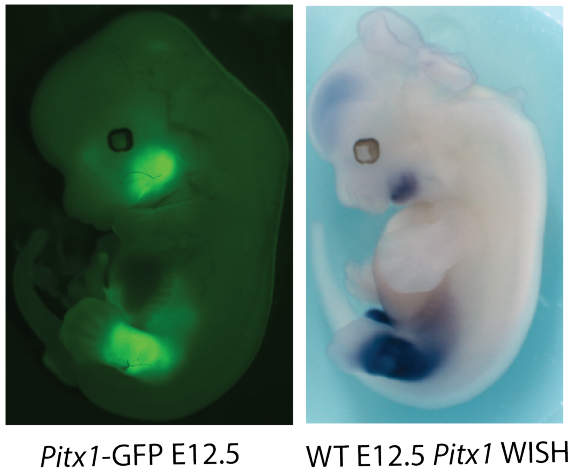

**B**

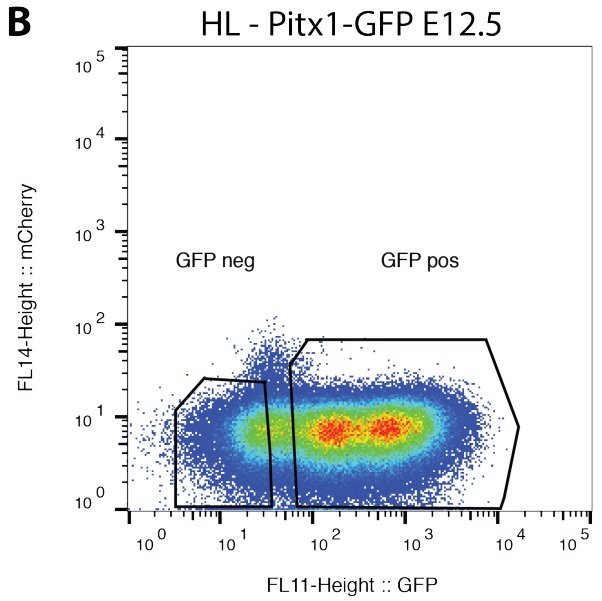

**C**

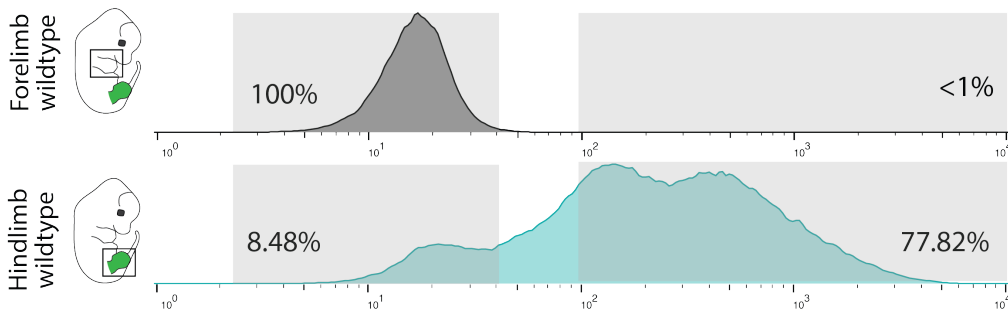

812  
813  
814  
815  
816

**Figure S1: FACS sorting of *Pitx1*<sup>GFPs/GFPs</sup> EGFP cells.** **A.** Fluorescence and *Pitx1* WISH of an E12.5 *Pitx1*<sup>GFP</sup> embryo. **B.** Overview of FACS gating with two fluorescent markers (mCherry on the y-axis and EGFP on the x-axis). **C.** *Pitx1*<sup>GFPs/GFPs</sup> forelimb cells were used to delimit the gating of GFP- cells.

817

818 **Supplementary figure 2**

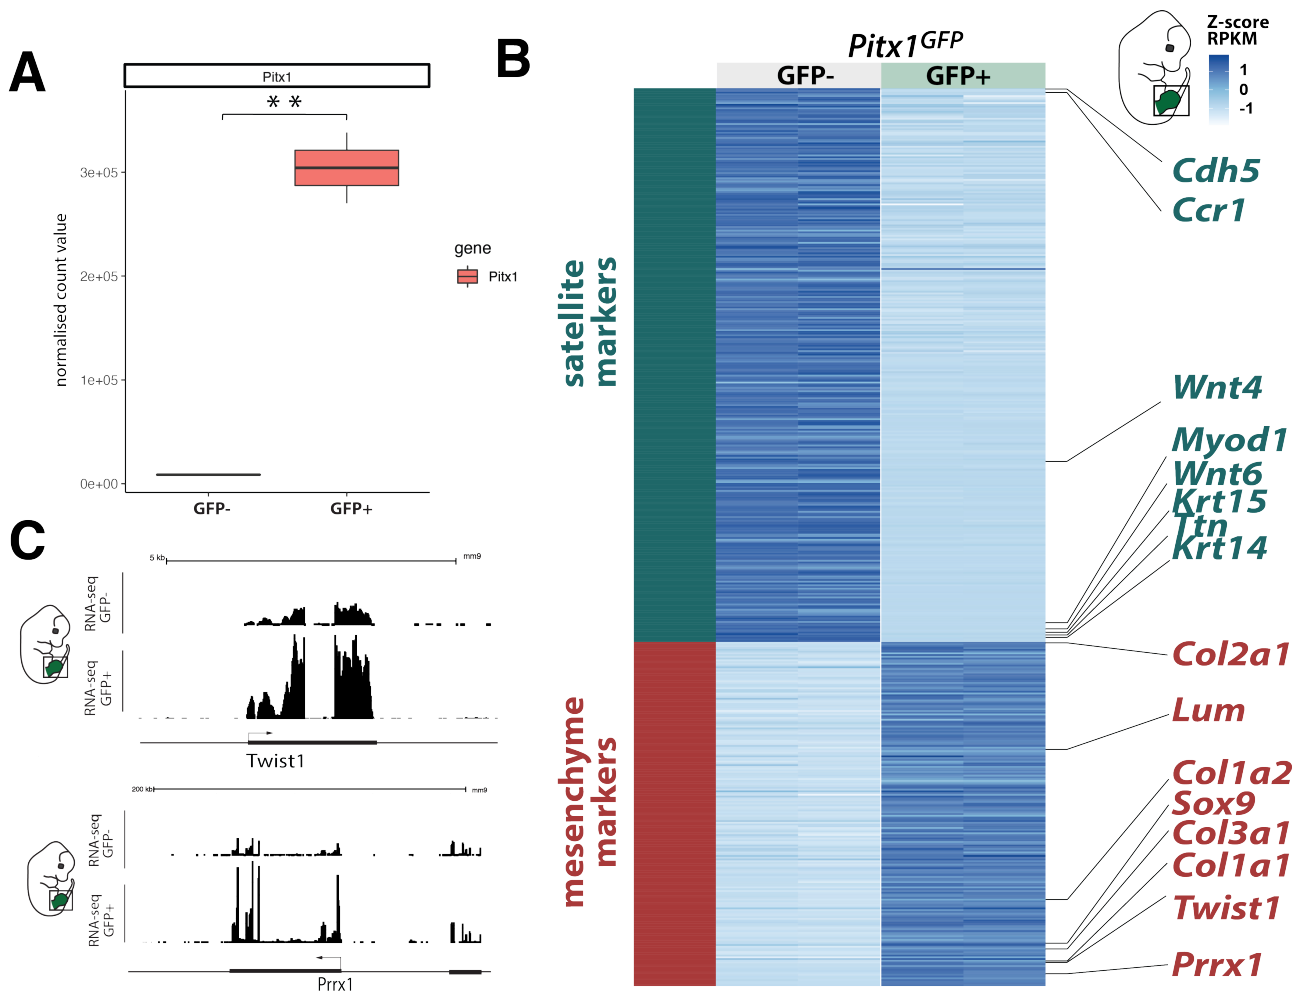

819

820 **Figure S2: A.** *Pitx1* normalized RNA-seq counts in GFP- and GFP+ *Pitx1<sup>GFP</sup>* hindlimb cells. \*\* indicate a p-value <0.01 as  
 821 calculated with a student t-test. **B.** Heatmap of differentially mesenchymal (red) and satellite (darkgreen) marker genes  
 822 in GFP+ and GFP- cells in *Pitx1<sup>GFP</sup>* hindlimbs. Note that GFP+ cells are enriched for condensating cells (*Sox9*, *Col2a1*),  
 823 connective tissue (*Col1a1*, *Col2a1*, *Col3a1*) and mesenchymal patterning genes (*Shox2*, *Twist1*, *Prrx1*). GFP- cells are  
 824 enriched for muscle (*Myod1*, *Ttn*), epithelial (*Wnt6*, *Wnt4*, *Krt14*, *Krt5*), immune (*Ccr1*) and endothelial cells (*Cdh5*). **C.**  
 825 RNA-seq tracks at the *Twist1* and *Prrx1* mesenchymal marker loci in GFP- and GFP+ *Pitx1<sup>GFP</sup>* hindlimb cells. Note that in  
 826 GFP- cells there is expression of these genes, indicating that some GFP- cells are of mesenchymal origin.

827

828

829 **Supplementary figure 3**

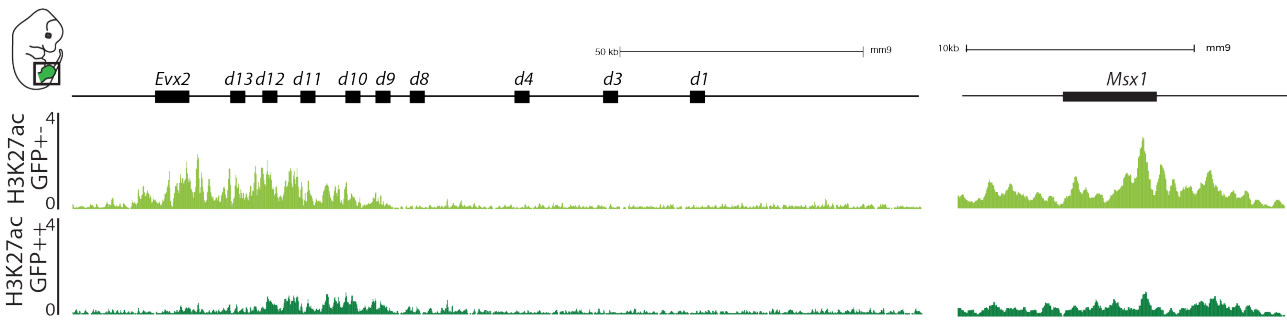

830

831 **Figure S3:** H3K27ac ChIP-seq in mild- and high-expressing hindlimb cell population at the *HoxA* cluster and at the *Msx1*  
832 locus. Note the stronger activity in the mildly active cells.

833

834 **Supplementary figure 4**

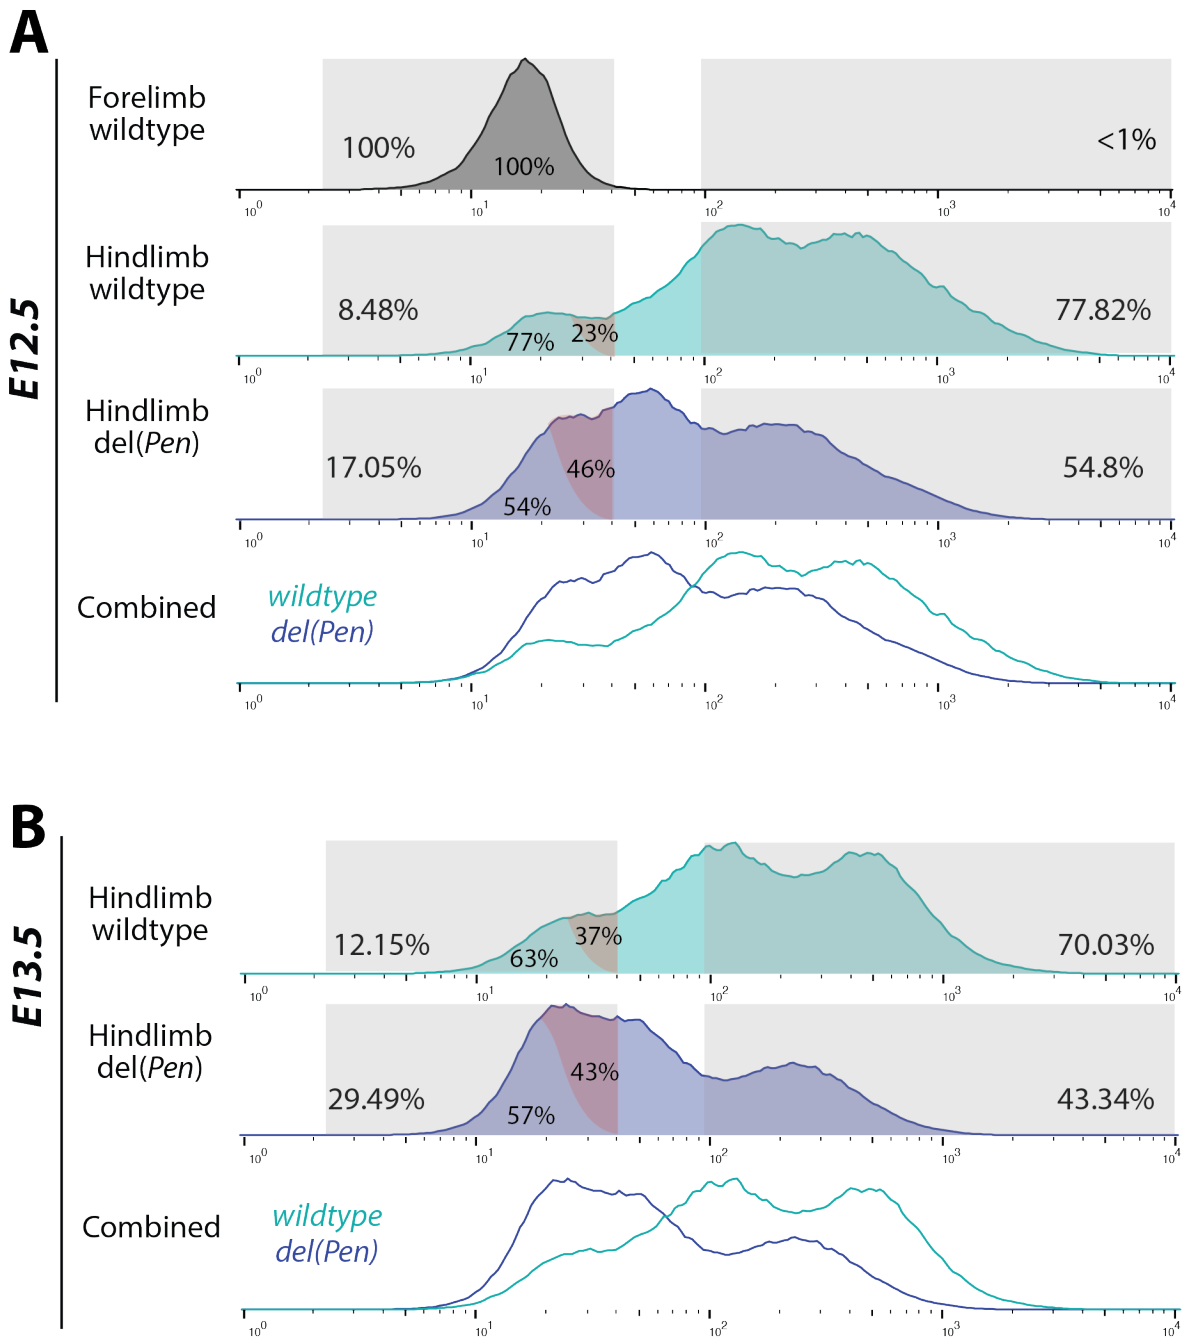

835

836 **Figure S4: A.** Comparison of FACS profile in wildtype E12.5 fore- and hindlimb and in del(*Pen*) hindlimb. Note the  
 837 increase in the negative cell fraction that includes an increase in non- and low cells. In the negative fraction, the low-  
 838 expressing cells (red shadowed) increased their proportion with respect to non-expressing cells from 23% in wildtype  
 839 to 46% in mutant (according to surface ratio). **B.** Comparison of FACS profile in wildtype and del(*Pen*) E13.5 hindlimbs.  
 840 In the negative fraction, the low-expressing cells (red shadowed) increased their proportion with respect to non-  
 841 expressing from 37% in wildtype to 43% in mutant (according to surface ratio).

842

843



844 **Supplementary figure 5**

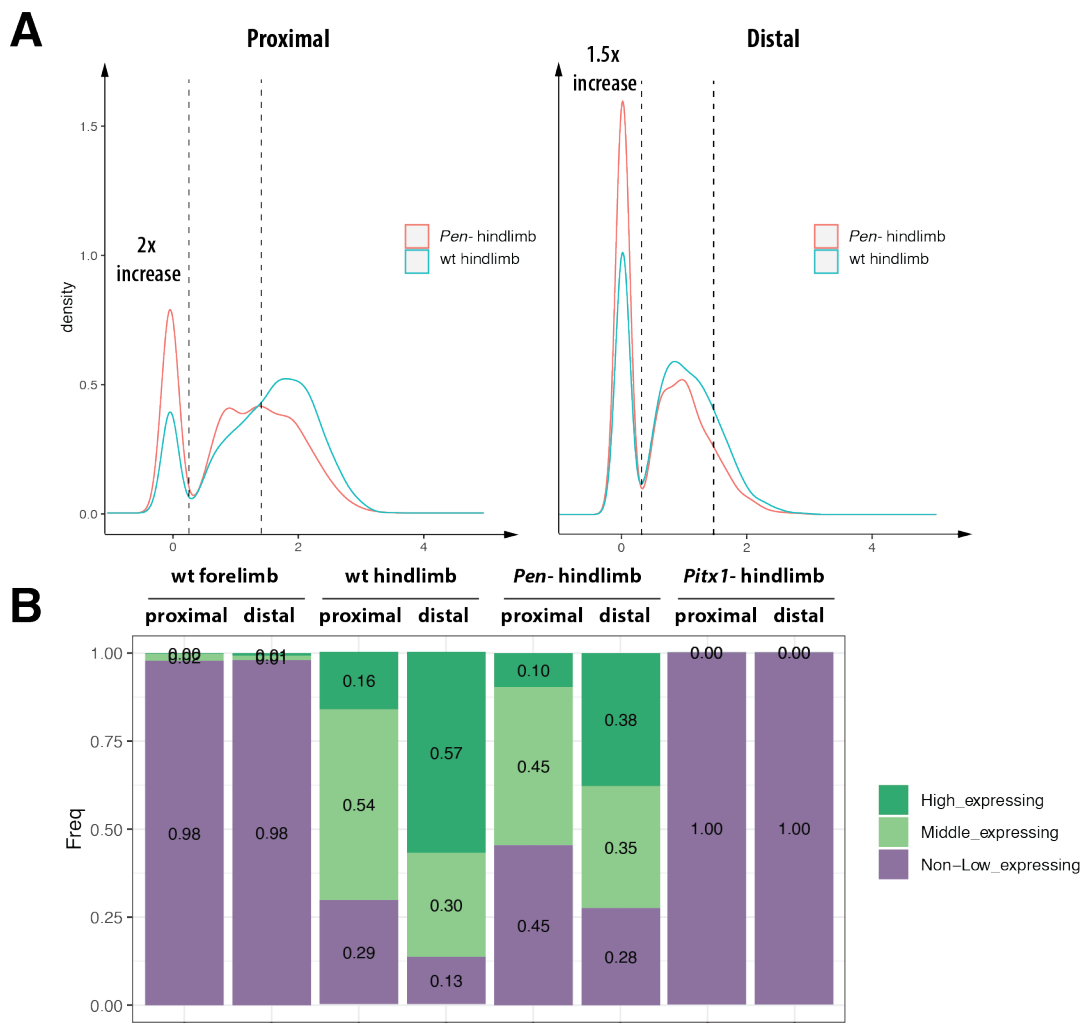

845

846 **Figure S5: A.** Distribution of *Pitx1* expression in proximal and distal cells of the hindlimbs in wt and *Pen-*. Note the strong  
 847 increase in proximal none/low-expressing cell fraction. **B.** Proportion of *Non/low-*, *mild* and *high-Pitx1* expressing cells  
 848 across conditions.  
 849

850

851 **Supplementary figure 6**

**wildtype mesenchyme**

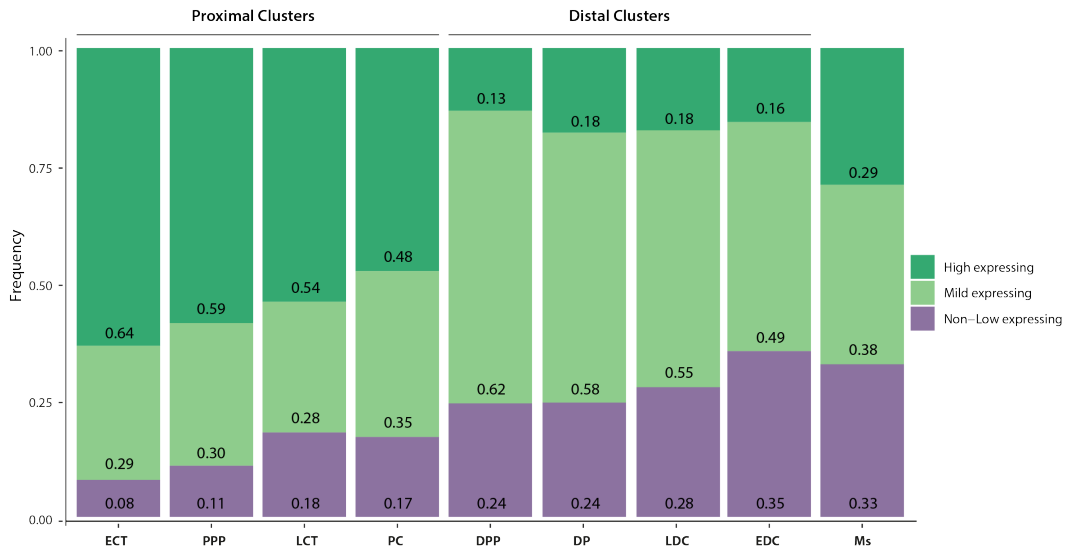

***Pitx1*<sup>pen-/pen-</sup> mesenchyme**

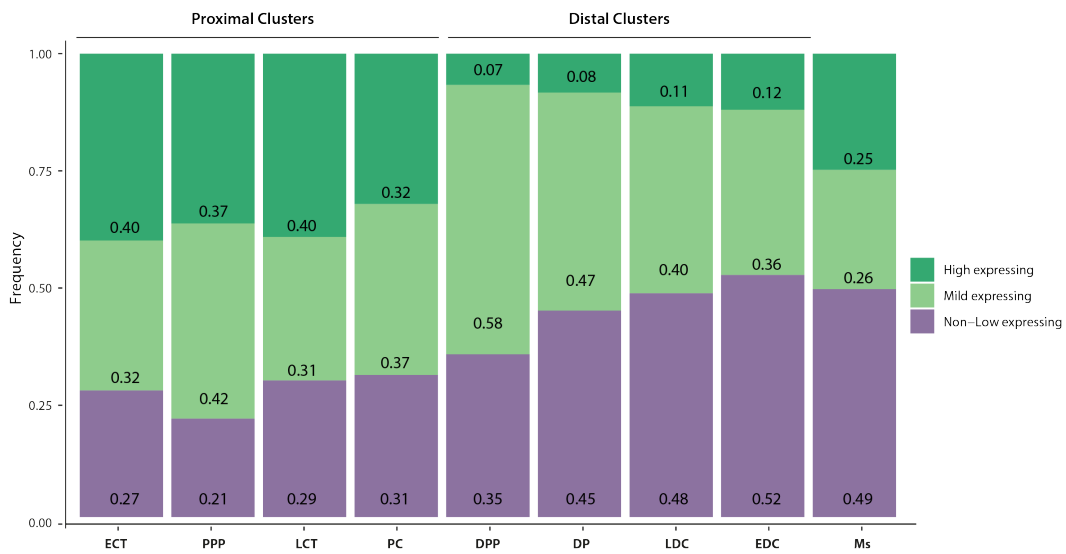

852

853 **Figure S6:** Proportion of *Non/low-, mild and high-Pitx1* expressing cells in all mesenchymal cell clusters of wildtype and  
854 *Pen* deleted hindlimbs.

855

856

857 **Supplementary figure 7**

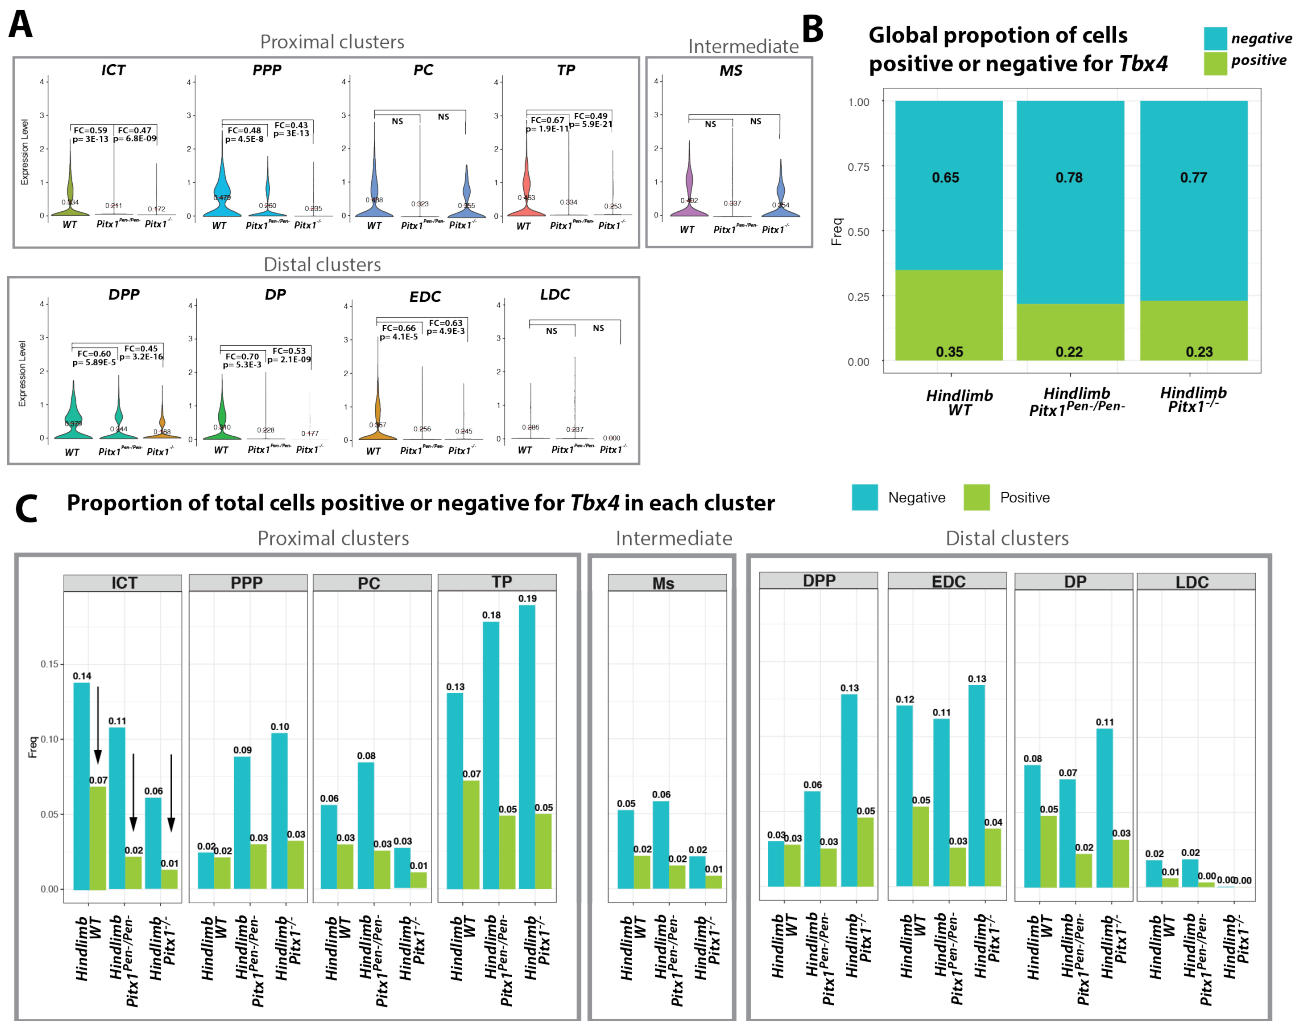

858

859 **Figure S7: Effect of *Pitx1*<sup>-/-</sup> and *Pitx1*<sup>Pen-/Pen-</sup> on *Tbx4* expression. A.** Violin plots of *Tbx4* expression in all mesenchymal  
 860 clusters in wt, *Pitx1*<sup>-/-</sup> and *Pitx1*<sup>Pen-/Pen-</sup> hindlimbs. **B.** Proportion of *Tbx4* expressing and non-expressing cells across the  
 861 mesenchyme in wt, *Pitx1*<sup>-/-</sup> and *Pitx1*<sup>Pen-/Pen-</sup> hindlimbs. **C.** Proportion of *Tbx4* expressing and non-expressing cells  
 862 across all mesenchymal clusters in wt, *Pitx1*<sup>-/-</sup> and *Pitx1*<sup>Pen-/Pen-</sup> hindlimbs.

863

864 **Supplementary figure 8**

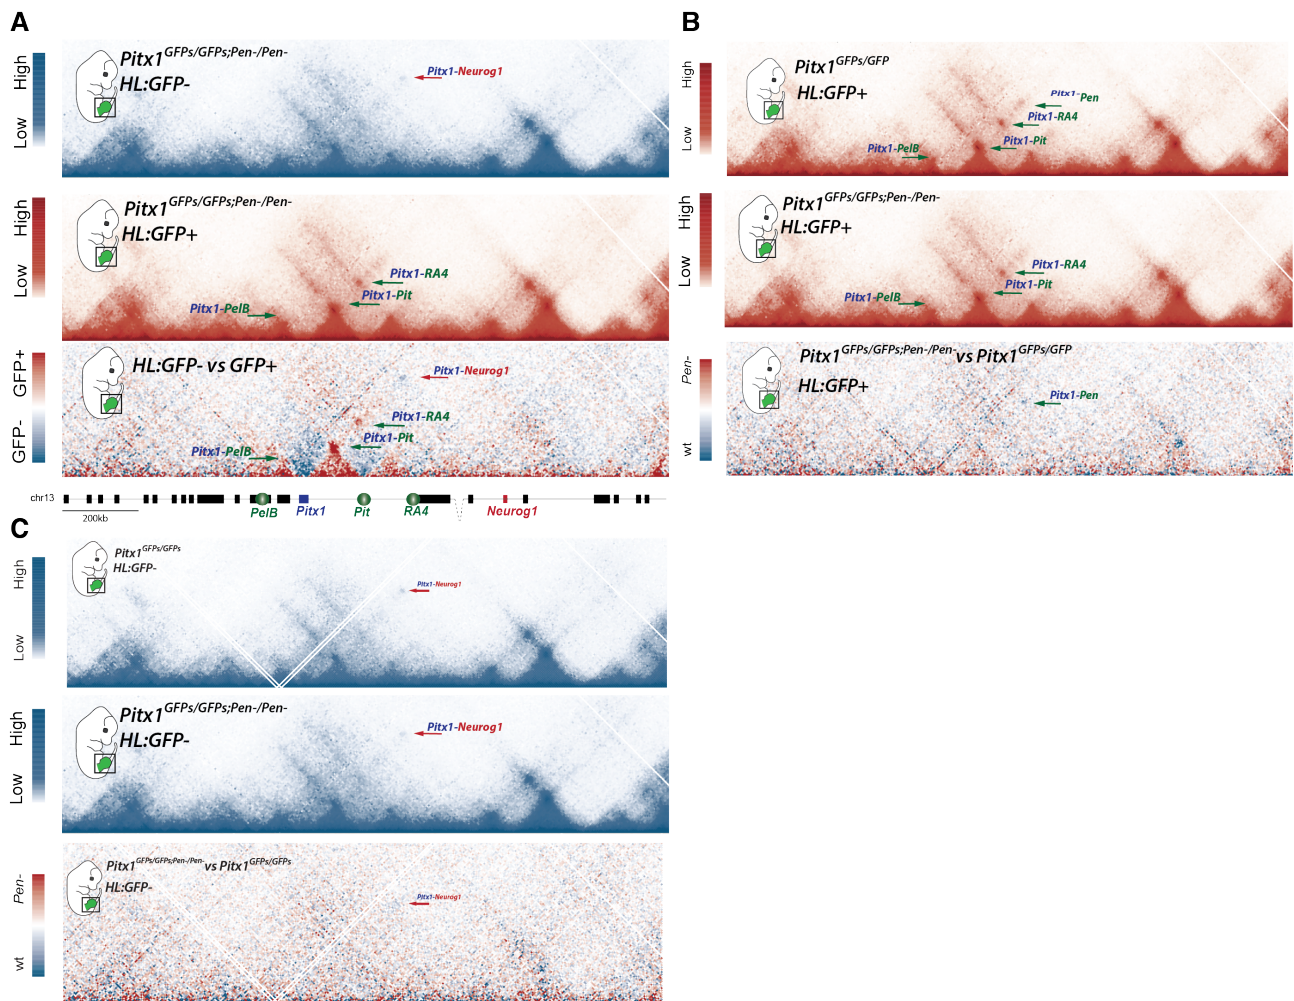

865

866 **Figure S8: A.** C-HiC in GFP- (upper panel) and GFP+ (lower panel) sorted hindlimb cells. The lower panel represent a  
 867 subtraction between the two upper ones. **B.** C-HiC of *Pitx1*<sup>GFPs</sup> GFP+ hindlimb cells (upper panel) and subtraction of  
 868 this map with the *Pitx1*<sup>GFP; $\Delta$ Pen</sup> GFP+ cells. **C.** C-HiC of *Pitx1*<sup>GFP</sup> GFP- hindlimb cells (upper panel) and subtraction of this  
 869 map with the *Pitx1*<sup>GFP; $\Delta$ Pen</sup> GFP- cells.

870

871 **Legends to supplementary tables and video**

872 **Table S1:** Marker genes for single cell clusters

873 **Table S2:** DeSeq2 analysis of GFP- vs GFP+ *Pitx1*<sup>GFP</sup> hindlimbs. Positive FC indicate enrichment in GFP+ cells and  
874 negative FC indicate enrichment in GFP- cells.

875 **Table S3:** DeSeq2 analysis of *Pitx1*<sup>GFP</sup> vs *Pitx1*<sup>GFP;ΔPen</sup> GFP- hindlimb cells. Positive Log2FC indicates enrichment in GFP-  
876 cells of *Pitx1*<sup>GFP;ΔPen</sup> hindlimbs and negative Log2FC indicates depletion in GFP- cells from *Pitx1*<sup>GFP</sup> hindlimbs.

877 **Table S4:** DeSeq2 analysis of *Pitx1*<sup>GFP</sup> vs *Pitx1*<sup>GFP;ΔPen</sup> GFP+ hindlimb cells. Positive Log2FC indicates enrichment in GFP+  
878 cells of *Pitx1*<sup>GFP;ΔPen</sup> hindlimbs and negative Log2FC indicates depletion in GFP+ cells from *Pitx1*<sup>GFP</sup> hindlimbs.

879 **Table S5:** sgRNAs used in this study and relative genomic location

880 **Video S1:** 3D reconstruction of an *Pitx1*<sup>GFP</sup> E12.5 embryo.

881

882

883

884
